# Genetic diagnosis of Mendelian disorders via RNA sequencing

Laura S Kremer<sup>1,2,21</sup>, Daniel M Bader<sup>3,4,21</sup>, Christian Mertes<sup>3</sup>, Robert Kopajtich<sup>1,2</sup>, Garwin Pichler<sup>5</sup>, Arcangela Iuso<sup>1,2</sup>, Tobias B Haack<sup>1,2</sup>, Elisabeth Graf<sup>1,2</sup>, Thomas Schwarzmayr<sup>1,2</sup>, Caterina Terrile<sup>1</sup>, Eliška Koňářková<sup>1,2</sup>, Birgit Repp<sup>1,2</sup>, Gabi Kastenmüller<sup>6</sup>, Jerzy Adamski<sup>7</sup>, Peter Lichtner<sup>1</sup>, Christoph Leonhardt<sup>8</sup>, Benoit Funalot<sup>9</sup>, Alice Donati<sup>10</sup>, Valeria Tiranti<sup>11</sup>, Anne Lombes<sup>12,13,14</sup>, Claude Jardel<sup>12,15</sup>, Dieter Gläser<sup>16</sup>, Robert W. Taylor<sup>17</sup>, Daniele Ghezzi<sup>11</sup>, Johannes A Mayr<sup>18</sup>, Agnes Rötig<sup>8</sup>, Peter Freisinger<sup>19</sup>, Felix Distelmaier<sup>20</sup>, Tim M Strom<sup>1,2</sup>, Thomas Meitinger<sup>1,2</sup>, Julien Gagneur<sup>3,4,\*</sup>, Holger Prokisch<sup>1,2,\*</sup>.

1. Institute of Human Genetics, Helmholtz Zentrum München, 85764 Neuherberg, Germany
2. Institute of Human Genetics, Klinikum rechts der Isar, Technische Universität München, 81675 München, Germany
3. Department of Informatics, Technische Universität München, 85748 Garching, Germany
4. Quantitative Biosciences Munich, Gene Center, Department of Biochemistry, Ludwig Maximilian Universität München, 81377 Munich, Germany
5. Department of Proteomics and Signal Transduction, Max-Planck Institute of Biochemistry, 82152 Martinsried, Germany
6. Institute of Bioinformatics and Systems Biology, Helmholtz Zentrum München, 85764 Neuherberg, Germany
7. Institute of Experimental Genetics, Genome Analysis Center, Helmholtz Zentrum München, German Research Center for Environmental Health, 85764 Neuherberg, Germany
8. Neuropädiatrie, Neonatologie, 78050 Villingen-Schwenningen, Germany
9. INSERM U1163, Université Paris Descartes - Sorbonne Paris Cité, Institut Imagine, 75015 Paris, France
10. Metabolic Unit, A. Meyer Children's Hospital, Florence, Italy
11. Unit of Molecular Neurogenetics, Foundation IRCCS (Istituto di Ricovero e Cura a Carettere Scientifico) Neurological Institute "Carlo Besta", 20126 Milan, Italy
12. Inserm UMR 1016, Institut Cochin, 75014 Paris, France
13. CNRS UMR 8104, Institut Cochin, 75014 Paris, France
14. Université Paris V René Descartes, Institut Cochin, 75014 Paris, France
15. AP/HP, GHU Pitié-Salpêtrière, Service de Biochimie Métabolique, 75013, Paris, France
16. Genetikum, Genetic Counseling and Diagnostics, 89231 Neu-Ulm, Germany
17. Wellcome Trust Centre for Mitochondrial Research, Institute of Neuroscience, Newcastle University, Newcastle upon Tyne, NE2 4HH, UK
18. Department of Pediatrics, Paracelsus Medical University, A-5020 Salzburg, Austria
19. Department of Pediatrics, Klinikum Reutlingen, 72764 Reutlingen, Germany
20. Department of General Pediatrics, Neonatology and Pediatric Cardiology, University Children's Hospital, Heinrich-Heine-University Düsseldorf, 40225 Düsseldorf, Germany
21. These authors contributed equally to this work.

\* Correspondence should be addressed to Holger Prokisch ([prokisch@helmholtz-muenchen.de](mailto:prokisch@helmholtz-muenchen.de)) or Julien Gagneur ([gagneur@in.tum.de](mailto:gagneur@in.tum.de)).

## 44 *Abstract*

45 **Across a large variety of Mendelian disorders, ~50-75% of patients do not receive a**  
46 **genetic diagnosis by whole exome sequencing indicative of underlying disease-causing**  
47 **variants in non-coding regions. In contrast, whole genome sequencing facilitates the**  
48 **discovery of all genetic variants, but their sizeable number, coupled with a poor**  
49 **understanding of the non-coding genome, makes their prioritization challenging. Here, we**  
50 **demonstrate the power of transcriptome sequencing to provide a confirmed genetic**  
51 **diagnosis for 10% (5 of 48) of undiagnosed mitochondrial disease patients and identify**  
52 **strong candidate genes for patients remaining without diagnosis. We found a median of 1**  
53 **aberrantly expressed gene, 5 aberrant splicing events, and 6 mono-allelically expressed**  
54 **rare variants in patient-derived fibroblasts and established disease-causing roles for each**  
55 **kind. Private exons often arose from sites that are weakly spliced in other individuals,**  
56 **providing an important clue for future variant prioritization. One such intronic exon-**  
57 **creating variant was found in three unrelated families in the complex I assembly factor**  
58 **TIMMDC1, which we consequently established as a novel disease-associated gene. In**  
59 **conclusion, our study expands the diagnostic tools for detecting non-exonic variants of**  
60 **Mendelian disorders and provides examples of intronic loss-of-function variants with**  
61 **pathological relevance.**

62 Despite the revolutionizing impact of whole exome sequencing (WES) on the molecular  
63 genetics of Mendelian disorders, ~50-75% of the patients do not receive a genetic diagnosis after  
64 WES<sup>1-6</sup>. The disease-causing variants might be detected by WES but remain as variants of  
65 unknown significance (VUS, Methods) or they are missed due to the inability to prioritize them.  
66 Many of these VUS are synonymous or non-coding variants that may affect RNA abundance or  
67 isoform but cannot be prioritized due to the poor understanding of regulatory sequence to date  
68 compared to coding sequence. Furthermore, WES covers only the 2% exonic regions of the  
69 genome. Accordingly, it is mostly blind to regulatory variants in non-coding regions that could  
70 affect RNA sequence and abundance. While the limitation of genome coverage is overcome by  
71 whole genome sequencing (WGS), prioritization and interpretation of variants identified by  
72 WGS is in turn limited by their amount<sup>7-9</sup>.

73 With RNA sequencing (RNA-seq), limitations of the sole genetic information can be  
74 complemented by directly probing variations in RNA abundance and in RNA sequence,  
75 including allele-specific expression and splice isoforms. At least three extreme situations can be  
76 directly interpreted to prioritize candidate disease-causing genes for a rare disorder. First, the  
77 expression level of a gene can lie outside its physiological range. Genes with expression outside  
78 their physical range can be identified as expression outliers, often using a stringent cutoff on  
79 expression variations, for instance using the Z-score<sup>10</sup> or statistics at the level of whole gene  
80 sets<sup>11,12</sup>. The genetic causes of such aberrant expression includes rare variants in the promoter<sup>13</sup>  
81 and enhancer but also in coding or intronic regions<sup>10</sup>. Second, RNA-seq can reveal extreme cases  
82 of allele-specific expression (mono-allelic expression), whereby one allele is silenced, leaving  
83 only the other allele expressed. When assuming a recessive mode of inheritance, genes with a  
84 single heterozygous rare coding variant identified by WES or WGS analysis are not prioritized.  
85 However, mono-allelic expression of such variants fits the recessive mode of inheritance  
86 assumption. Detection of mono-allelic expression can thus help re-prioritizing heterozygous rare  
87 variants. Reasons for mono-allelic expression can be genetic. A pilot study validated compound

88 heterozygous variants within one gene as cause of TAR syndrome, where one allele is deleted  
89 and the other harbors a non-coding variant that reduces expression<sup>14</sup>. Mono-allelic expression  
90 can also have epigenetic causes such as X-chromosome inactivation or imprinting on autosomal  
91 genes, possibly by random choice<sup>15,16</sup>. Third, splicing of a gene can be affected. Aberrant  
92 splicing has long been recognized as a major cause of Mendelian disorders (reviewed in ref.<sup>17-</sup>  
93 <sup>19</sup>). However, the prediction of splicing defects from genetic sequence is difficult because  
94 splicing involves a complex set of cis-regulatory elements that are not yet fully understood.  
95 Some of them can be deeply located in intronic sequences<sup>20</sup> and are thus not covered by WES.  
96 Hence, direct probing of splice isoforms by RNA-seq is important, and has led to the discovery  
97 of multiple splicing defects based on single gene studies: skipping of multiple exons (exon 45-  
98 55)<sup>21</sup> and creation of a new exon by a deep intronic variant in *DMD*<sup>22</sup>, intron retention in *LMNA*  
99 caused by a 5' splice site variant<sup>23</sup>, and skipping of exon 7 in *SMN1* caused by a variant in a  
100 splicing factor binding site<sup>24</sup>. Altogether, RNA-seq promises to be an important complementary  
101 tool to facilitate molecular diagnosis of rare genetic disorders. However, no systematic study to  
102 date has been conducted to assess its power.

103 Here, we established an analysis pipeline to systematically detect instances of i) aberrant  
104 expression, ii) aberrant splicing, and iii) mono-allelic expression of the alternative allele to  
105 complement whole exome sequencing based genetic diagnosis. We considered applying our  
106 approach on patients diagnosed with a mitochondrial disorder for three reasons. First,  
107 mitochondrial diseases collectively represent one of the most frequent inborn errors of  
108 metabolism affecting 2 in 10,000 individuals<sup>25</sup>. Second, the broad range of unspecific clinical  
109 symptoms and the genetic diversity in mitochondrial diseases makes molecular diagnosis  
110 difficult and WES often results in variants of unknown significance. As a consequence of the bi-  
111 genomic control of the energy-generating oxidative phosphorylation (OXPHOS) system,  
112 mitochondrial diseases may result from pathogenic mutations of the mitochondrial DNA  
113 (mtDNA) or nuclear genome. More than 1,500 different nuclear genes encode mitochondrial  
114 proteins<sup>26</sup> and causal defects have been identified in approximately 300 genes and presumably  
115 more additional disease-associated genes still awaiting identification<sup>27</sup>. Third, since the diagnosis  
116 often relies on biochemical testing of a tissue sample, fibroblast cell lines are usually available  
117 from those patients. Moreover, for many patients, the disease mechanisms can be assayed in  
118 epidermal fibroblast cell lines even though the disease may manifest in different tissues<sup>28</sup>. This  
119 allows rapid demonstration of the necessary and sufficient role of candidate variants by  
120 perturbation and complementation assays<sup>29</sup>. This also indicates that disease-causing expression  
121 defects, if any, should be detectable in these cell lines.

## 122 **Results**

123 We performed RNA-seq on 105 fibroblast cell lines from patients with a suspected  
124 mitochondrial disease including 48 patients for which whole exome sequencing based variant  
125 prioritization did not yield a genetic diagnosis (Fig. 1, Methods). After discarding lowly  
126 expressed genes, RNA-seq identified 12,680 transcribed genes (at least 10 reads in 5% of all  
127 samples, Methods, Supplementary Data 1). We systematically prioritized genes with the  
128 following three strategies: i) genes with aberrant expression level<sup>11-13</sup>, ii) genes with aberrant  
129 splicing<sup>22,30</sup>, and iii) mono-allelic expression of rare variants<sup>14</sup> (Fig. 1) to estimate their disease

130 association. All strategies are based on the comparison of one patient against the rest. We  
131 assumed the causal defects to differ between patients, which is reasonable for mitochondrial  
132 disorders with a diversity of ~300 known disease-causing genes (Supplementary Data 2).  
133 Therefore, the patients serve as good controls for each other.

134 Once normalized for technical biases, sex, and biopsy site (Supplementary information and  
135 Supplementary Fig. 1), the samples typically presented few aberrantly expressed genes (median  
136 of 1, Fig. 2a, Supplementary Table 1) with a large effect ( $|Z\text{-score}| > 3$ ) and significant  
137 differential expression (Hochberg adjusted  $P\text{-value} < 0.05$ ). Among the most aberrantly  
138 expressed genes across all samples, we found 2 genes encoding mitochondrial proteins, *MGST1*  
139 (one case) and *TIMMDC1* (two cases) to be significantly down-regulated (Fig. 2b-d and  
140 Supplementary Fig. 2). For both genes, WES did not identify any variants in the respective  
141 patients, no variant is reported to be disease-associated, and no case of potential bi-allelic rare  
142 variant is listed in our in-house database comprising more than 1,200 whole-exomes from  
143 mitochondrial patients and 15,000 WES dataset available to us from different ongoing research  
144 projects. To evaluate the consequences of diminished RNA expression at the protein level, we  
145 performed quantitative proteomics in a total of 31 fibroblast cell lines (including these three  
146 patients, and further 17 undiagnosed and 11 diagnosed patients, Methods, Supplementary Table  
147 2, Supplementary Data 3) from a second aliquot of cells taken at the same time as the RNA-seq  
148 aliquot. Normalized RNA and protein expression levels showed a median rank correlation of  
149 0.59, comparable to what has been previously reported<sup>31,32</sup> (Supplementary Fig. 3). Patient  
150 #73804 showed ~2% of control *MGST1* level whilst the lack of detection of *TIMMDC1* in both  
151 patients (#35791 and #66744) confirmed an even stronger effect on protein expression,  
152 indicating loss of function (Fig. 2e and Supplementary Fig. 4). *MGST1*, a microsomal  
153 glutathione S-transferase, is involved in the oxidative stress defense<sup>33</sup>. Consequently, the loss of  
154 expression of *MGST1* is not only a likely cause of the disease of this patient, who suffers from  
155 an infantile-onset neurodegenerative disorder similar to a recently published case with another  
156 defect in the reactive oxygen species (ROS) defense system (Supplementary Information)<sup>34</sup>, but  
157 also suggests a treatment with antioxidants. Both *TIMMDC1* patients presented with muscular  
158 hypotonia, developmental delay, and neurological deterioration, which led to death in the first 3  
159 years of life (Supplementary Information). Consistent with the described function of *TIMMDC1*  
160 as a respiratory chain complex I assembly factor<sup>35,36</sup>, we found isolated complex I deficiency in  
161 muscle (Supplementary Fig. 2), and globally decreased levels of complex I subunits in  
162 fibroblasts by quantitative proteomics (Fig. 2e and Supplementary Fig. 2) and western blot (Fig.  
163 2f). Re-expression of *TIMMDC1* in these cells increased complex I subunit levels (Fig. 2f).  
164 These results not only validate *TIMMDC1*-deficiency as disease causing but also provide  
165 compelling evidence for an important function of *TIMMDC1* in complex I assembly.

166  
167 We identified aberrant splicing events by testing for differential splicing in each patient  
168 against the others, using an annotation-free algorithm able to detect also novel splice sites  
169 (Methods, median of 5 abnormal events per sample, Fig. 3a). Among the 175 aberrant spliced  
170 genes detected in the undiagnosed patients, the most abundant events were, apart from  
171 differential expression of isoforms, exon skipping followed by the creation of new exons (Fig.  
172 3b). Two genes encoding mitochondrial proteins, *TIMMDC1* and *CLPP*, which were among the  
173 20 most significant genes, caught our attention (Supplementary Table 3). Out of 136 exon-  
174 junction reads overlapping the acceptor site of *CLPP* exon 6 for patient #58955, 82 (percent  
175 spliced in<sup>37</sup>  $\Psi = 60\%$ ) skipped exon 5, and 14 ( $\Psi = 10\%$ ) showed a 3'-truncated exon 5, in



176 striking contrast to other samples (Fig. 3c). The likely genetic cause of these two splice defects is  
177 a rare homozygous variant in exon 5 of *CLPP* affecting the last nucleotide of exon 5 (c.661G>A,  
178 p.Glu221Lys  $1.2 \times 10^{-5}$  frequency in the ExAC database<sup>38</sup>, Supplementary Fig. 5). Both detected  
179 splice defects result in truncated CLPP and western blots corroborated the complete loss of full-  
180 length CLPP (Supplementary Fig. 5). Our WES variant filtering reported this variant as a VUS  
181 and classified *CLPP* as one among 30 other potentially bi-allelic affected candidate genes  
182 (Supplementary Table 1). Since the variant was of unknown significance, the patient remained  
183 without genetic diagnosis. The loss of function found by RNA-seq and confirmed by Western  
184 blotting now highlights clinical relevance of the variant within *CLPP*. *CLPP* encodes a  
185 mitochondrial ATP-dependent endopeptidase<sup>39</sup> and *CLPP*-deficiency causes Perrault  
186 syndrome<sup>40,41</sup> (OMIM #601119) which is overlapping with the clinical presentation of the patient  
187 investigated here including microcephaly, deafness, and severe psychomotor retardation  
188 (Supplementary Information). Moreover, a study recently showed that *Clpp*<sup>-/-</sup> mice are deficient  
189 for complex IV expression<sup>42</sup>, in line with complex IV deficiency of this patient (Supplementary  
190 Fig. 5).

191  
192 Split read distribution indicated that both *TIMMDC1*-deficient patients expressed almost  
193 exclusively a *TIMMDC1* isoform with a new exon in intron 5 (Fig. 3d). This new exon  
194 introduces a frameshift yielding a premature stop codon (p.Gly199\_Thr200ins5\*, Fig. 3e).  
195 Moreover, this new exon contained a rare variant (c.596+2146A>G) not listed in the 1,000  
196 Genomes Project<sup>7,8</sup>. Whole genome sequencing demonstrated that this variant is homozygous in  
197 both patients (Fig. 3e), the only rare variant in this intron and close to the splice site (+6 of the  
198 new exon). We could not identify any rare variant in the promoter region or in any intron-exon  
199 boundary of *TIMMDC1*. Additionally, when testing six prediction tools for splicing events, this  
200 deep intronic rare variant is predicted by SpliceAid2<sup>43</sup> to create multiple binding sites for splice  
201 enhancers. Together with the correctly predicted new acceptor and donor sites by SplicePort<sup>44</sup>  
202 (Feature generation algorithm score 0.112 and 1.308, respectively) this emphasizes the influence  
203 of this variant in the creation of the new exon. Besides, the four other tools predicted no  
204 significant change in splicing<sup>45-48</sup>. We further discovered an additional family in our in-house  
205 WGS database (consisting of 36 patients with a suspected mitochondrial disorder and 232 further  
206 patients with unrelated diseases) carrying the same homozygous intronic variant. In this family  
207 three affected siblings presented with similar clinical symptoms although without a diagnosis of  
208 a mitochondrial disorder (Fig. 3e, Supplementary Fig. 2). Two siblings died before the age of 10.  
209 A younger brother (#96687), now 6 years of age, presented with muscle hypotonia, failure to  
210 thrive and neurological impairment (Supplementary Information), similar to the patients  
211 described above. Western blot analysis confirmed *TIMMDC1*-deficiency (Fig. 2f) and impaired  
212 complex I assembly, which was restored after re-expression of *TIMMDC1* (Fig. 2g). The  
213 discovery of the same intronic *TIMMDC1* variant in three unrelated families from three different  
214 ethnicities provides convincing evidence on the causality of this variant for the *TIMMDC1* loss-  
215 of-function.

216 In almost all non-*TIMMDC1*-deficiency samples, we noticed a few split reads supporting  
217 inclusion of the new exon (Fig. 3d), consistent with an earlier report that many cryptic splice  
218 sites are not entirely repressed but active at low levels<sup>49</sup>. We set out to quantify this phenomenon  
219 and to interrogate the frequency of private exons originating from weakly spliced exons,  
220 independent of their possible association with disease. Consequently, we modeled the  
221 distribution of  $\Psi$  for the 1,603,042 splicing events detected genome-wide in 105 samples as a

222 mixture of three components. The model classified splicing frequencies per splice site as strong  
223 (20%, with  $\Psi > 5.3\%$ ), weak (16%, with  $0.16\% < \Psi < 5.3\%$ ), or background (64%, with  $\Psi <$   
224  $0.16\%$ , Methods, Fig. 3f and Supplementary Fig. 6). Strikingly, the majority (70%, 4.4-fold more  
225 than by chance) of the 17 discovered private exons originated from weak splice sites (Fig. 3f  
226 bottom). These data confirm that weakly spliced cryptic exons are loci more susceptible to turn  
227 into strongly spliced sites than other intronic regions. These weak splicing events are usually  
228 dismissed as 'noise' since they are only supported by few reads in a given sample. Our analysis  
229 shows that they can be detected as accumulation points across multiple individuals. Hence, these  
230 results suggest that the prioritization of deep intronic variants of unknown significances gained  
231 through WGS could be improved by annotating weak splice sites and their resulting cryptic  
232 exons.

233 As a third approach, we searched for mono-allelic expression (MAE) of rare variants. In  
234 median per sample, 35,521 heterozygous SNVs were detected by WES, of which 7,622 were  
235 sufficiently covered by RNA-seq to call MAE (more than 10 reads), 20 showed MAE (Hochberg  
236 adjusted  $P$ -value  $< 0.05$ , allele frequency  $\geq 0.8$ ), of which 6 were rare variants (minor allele  
237 frequency  $< 0.001$ , Methods, Fig. 4a). Amongst the 18 rare mono-allelic expressed variants in  
238 patient #80256 was a VUS in *ALDH18A1* (c.1864C>T, p.Arg622Trp, Fig. 4b), encoding an  
239 enzyme involved in mitochondrial proline metabolism<sup>50</sup>. This VUS had been seen in WES  
240 compound heterozygous with a nonsense variant (c.1988C>A, p.Ser663\*, Fig. 4b and  
241 Supplementary Fig. 7). Variants in *ALDH18A1* had been reported to be associated with cutis laxa  
242 III (OMIM #138250)<sup>51,52</sup>, yet the patient did not present cutis laxa. Because of this inconsistent  
243 phenotype and the unknown significance of the non-synonymous variant, the variants in  
244 *ALDH18A1* were not regarded as disease causing. However, RNA-seq-based aberrant expression  
245 (Supplementary Fig. 7) and mono-allelic expression analysis prioritized *ALDH18A1* again. Our  
246 systematically performed validation by quantitative proteomics revealed severe reduction down  
247 to ~2% ALDH18A1 (Fig. 4c), indicating that the rare MAE variant affects translation or protein  
248 stability. Metabolomics profile of blood plasma was in accordance with a defect in proline  
249 metabolism (Fig. 4d) and the following changes in urea cycle. Patient fibroblasts showed a  
250 growth defect that was rescued by supplementation of proline, validating impaired proline  
251 metabolism as the underlying molecular cause (Fig. 4e). Our experimental evidence strongly  
252 suggests that the two observed variants are causal. Moreover, a recent report<sup>53</sup> on *ALDH18A1*  
253 patients extended the phenotypic spectrum to spastic paraplegia (OMIM #138250), which  
254 resembles the symptoms of our patient (Supplementary information).

255 In another patient (#62346) we found borderline non-significant low expression of *MCOLN1*  
256 with 10 of 11 reads expressing an intronic VUS (c.681-19A>C, Fig. 4f). This intronic variant  
257 was detected as part of a retained intron, which introduced a nonsense codon (p.  
258 Lys227\_Leu228ins16\*, Fig. 4f and Supplementary Fig. 8). When looking at the WES data we  
259 could additionally identify a heterozygous nonsense variant (c.832C>T, p.Gln278\*). The allele  
260 with the exonic nonsense mutation was not expressed, most likely due to nonsense-mediated  
261 decay. Mutations in *MCOLN1* are associated with mucopolipidosis (OMIM #605248). The  
262 symptoms of the patient were initially suggestive for mucopolipidosis, but none of the enzymatic  
263 tests available for mucopolipidosis type 1, 2, and 3 revealed an enzyme deficiency in blood  
264 leukocytes (Supplementary information). Moreover, *MCOLN1* was missed by our WES variant  
265 filter since the intronic variant was not prioritized. Hence, the WES data could not be conclusive

266 about *MCOLNI*. In contrast, the RNA-seq data demonstrated two loss-of-function alleles in  
267 *MCOLNI* and therefore established the genetic diagnosis.

268

## 269 **Discussion**

270 Altogether, our study demonstrates the utility of RNA sequencing in combination with  
271 bioinformatics filtering criteria for genetic diagnosis by i) discovering a new disease-associated  
272 gene, ii) providing a diagnosis for 10% (5 of 48) of undiagnosed cases, and iii) identifying a  
273 limited number of strong candidates. We established a pipeline for the detection of aberrant  
274 expression, aberrant splicing and mono-allelic expression of rare variants, that is able to detect  
275 significant outliers, i.e. a median of 1, 5, and 6, respectively. Overall, for 36 patients our pipeline  
276 provides a strong candidate gene, i.e. a known disease-causing or mitochondrial protein-  
277 encoding gene, like *MGST1* (Fig 5a, Supplementary Table 1). This manageable amount, similar  
278 to the median number of 16 genes with rare potentially bi-allelic variants detected by WES,  
279 allows manual inspection and validation by disease experts. While filtering by frequency is  
280 highly efficient when focusing on the coding region, frequency filtering is not as effective for  
281 intronic or intergenic variants identified by WGS. The loss-of-function character observed on  
282 RNA level thus improved interpretation of VUS identified by genotyping.

283 We focused our analysis on one sample preparation pipeline, which has several advantages.  
284 Based on our experience, expression outliers can only reliably be detected after extensive  
285 normalization process. This needs information about all technical details starting from the  
286 biopsy, growth of the cells, to the RNA extraction and library preparation. Usually not all this  
287 information is available in published data sets. For detecting aberrant splicing such as new exons,  
288 we would recommend not to mix different tissues because splicing can be tissue-specific. Mono-  
289 allelic expression is the most robust of all criteria in this respect because it only relies on read  
290 counts within a sample. Overall, we recommend not relying on a single sample being compared  
291 to public RNA-seq datasets. Instead, RNA-seq should be included in the pipeline of diagnostic  
292 centers in order to generate matching controls over time. The situation is similar for whole  
293 exome and whole genome sequencing, where the control for platform-specific biases is  
294 important.

295 Here, we included genetically diagnosed patients in our RNA-seq analysis pipeline to  
296 increase the power for the detection of aberrant expression and aberrant splicing in fibroblast cell  
297 lines. However, when applied to the 40 diagnosed cases with WES and RNA-seq available,  
298 aberrant splicing detected 6 out of 8 cases with a causal splicing variant, mono-allelic expression  
299 recovered 3 out of 6 patients with heterozygous missense variants compound with a stop or  
300 frameshift variant, and aberrant expression recovered 3 out of 9 stop variants. Counterintuitively,  
301 only one of the 9 frame-shift variants did lead to a detectable RNA defect, i.e. mono-allelic  
302 expression of a near splice site intronic variant within a retained intron. The partial recovery of  
303 stop and frameshift variants may reflect incomplete non-sense mediated decay. For none of the  
304 14 genes where missense variants were disease causing, a RNA defect could be detected with our  
305 pipeline. This is expected, since missense variants more likely affect protein function rather than  
306 RNA expression (Supplementary table 4).

307 To our surprise, many newly diagnosed cases were caused by a defective splicing event,  
308 which caused loss of function (Fig 5b), confirming the increasing role of splicing defects in both  
309 Mendelian<sup>54,55</sup> and common disorders<sup>30</sup>. In the case of *TIMMDC1*, the causal variant was  
310 intronic, and thus not covered by WES. Even when detected by WGS, such deep intronic  
311 variants are difficult to prioritize from the sequence information alone. Here, we showed that  
312 RNA-seq of large cohorts can provide important information about intronic positions that are  
313 particularly susceptible to affect splicing when mutated. We showed that private exons often  
314 arise from loci with weak splicing of about 1%. This suggests that rare variants affecting such  
315 cryptic splice sites are more likely to affect splicing and that these can be detected as positions  
316 with low yet consistent splicing. We reason that analysis of a RNA-seq compendium of healthy  
317 donors across multiple tissues such as GTEx<sup>56</sup> could provide tissue-specific maps of cryptic  
318 splice sites useful for prioritizing intronic variants.

319 Genetic disorders typically show specificity to some tissues, some of which might not be  
320 easily accessible for RNA-sequencing. It is therefore natural to question whether transcriptome  
321 sequencing of an unaffected tissue can help diagnosis. Here, we performed RNA-seq on patient  
322 derived dermal fibroblast cell lines. The fibroblast cell lines are the byproducts of muscle  
323 biopsies routinely undertaken in the clinic to biochemically diagnose mitochondrial disorders  
324 with enzymatic assays. By using fibroblast cell lines we overcome the limited accessibility of the  
325 affected tissues, which in the case of mitochondrial disorders are often high energy demanding  
326 tissues like brain, heart, skeletal muscle or liver. It turns out that many genes with a  
327 mitochondrial function are expressed in most tissues<sup>57</sup>, including fibroblasts. Hence, extreme  
328 regulatory defects such as loss of expression or aberrant splicing of genes encoding  
329 mitochondrial proteins can be detected in fibroblasts, even though the physiological consequence  
330 on fibroblasts might be negligible. This property might be true for other diseases: the tissue-  
331 specific physiological consequence of a variant does not necessarily stem from tissue-specific  
332 expression of the gene harboring the variant. In many cases, tissue-specificity might be due to  
333 environmental or cellular context, or from tissue-specific expression of further genes. Hence,  
334 tissue-specificity does not preclude RNA-seq of unaffected tissues from revealing the causative  
335 defect for a large number of patients. Moreover, non-affected tissues have the advantage that the  
336 regulatory consequences on other genes are limited and therefore the causal defects are more  
337 likely to stand out as outliers<sup>58</sup>.

338 Parallel to our effort, another study systematically investigated the usage of RNA-seq for  
339 molecular diagnosis with a similar sample size, using muscle biopsies from rare neuromuscular  
340 disease patients<sup>55</sup>. Analogously to our approach, not only exome sequencing-based VUS  
341 candidates were validated, but also new disease-causing mechanisms identified using RNA-seq  
342 data. Despite a few differences in the approach (expression outliers were not looked for, only  
343 samples of the affected tissues were considered and using samples of healthy donors as controls),  
344 the results are in line with ours whereby aberrant splicing also turns out to be a frequent disease-  
345 causing event. Moreover, the success rate was even higher (35%) confirming the relevance of  
346 using RNA-seq for diagnosis of Mendelian disorders.

347 In conclusion, we predict that RNA sequencing will become an essential companion of genome  
348 sequencing to address undiagnosed cases of genetic disease.



## 349 **Methods**

### 350 **Exome sequencing**

351 Exome sequencing was essentially performed as described previously<sup>59</sup>. In brief, exonic  
352 regions were enriched using the SureSelect Human All Exon kit from Agilent (Supplemental  
353 Data 4) followed by sequencing as 100 bp paired-end runs on an Illumina HiSeq2000 and  
354 Illumina HiSeq2500 (AG\_50MB\_v4 and AG\_50MB\_v5 exome kit samples) or as 76 bp paired-  
355 end runs on the Illumina GAIIx (AG\_38MB\_v1 and AG\_50MB\_v3 exome kit samples).

### 356 **Exome alignment and variant prioritization**

357 Read alignment to the human reference genome (UCSC Genome Browser build hg19) was  
358 done using Burrows-Wheeler Aligner<sup>60</sup> (v.0.7.5a). Single-nucleotide variants and small  
359 insertions and deletions (indels) were detected with SAMtools<sup>61,62</sup>(version 0.1.19). Variants with  
360 a quality score below 90, a genotype quality below 90, a mapping quality below 30, and a read  
361 coverage below 10 were discarded. The reported variants and small indels were annotated with  
362 the most severe entry by the Variant Effector Predictor<sup>63</sup> based on The Sequence Ontology term  
363 ranking<sup>64</sup>. The candidate variants for one patient are filtered to be rare, affect the protein  
364 sequence and potentially both alleles.

365 Variants are rare with a minor allele frequency < 0.001 within the ExAC database<sup>38</sup> and a  
366 frequency < 0.05 among our samples. Variants affect the protein, if they are a coding structural  
367 variant or their mutation type is one of *ablation*, *deletion*, *frame-shift*, *incomplete*, *start lost*,  
368 *insertion*, *missense*, *splice*, *stop gain*, *stop retain*, *unstart*, *unstop*. A potential biallelic effect can  
369 be caused by either a homozygous or at least two heterozygous variants in the same gene,  
370 whereas in latter case we assume that the heterozygous variants are on different alleles  
371 (Supplementary Fig. 9). This filter is designed for a recessive type disease model and does not  
372 account for a single heterozygous variant that could be disease-causing in a dominant way.

### 373 **Variant of unknown significance**

374 “A variation in a genetic sequence whose association with disease risk is unknown. Also  
375 called unclassified variant, variant of uncertain significance, and VUS.” (see  
376 <https://www.cancer.gov/publications/dictionaries/genetics-dictionary?cdrid=556493> )

### 377 **Cell culture**

378 Primary patient fibroblast cell lines, normal human dermal fibroblasts (NHDF) from neonatal  
379 tissue (Lonza), and 293FT cells (Thermo Fisher Scientific) were cultured in high glucose DMEM  
380 (Life Technologies) supplemented with 10% FBS, 1% penicillin/streptomycin, and 200  $\mu$ M  
381 uridine at 37 °C and 5% CO<sub>2</sub>. All fibroblast cell lines have been tested negative for mycoplasma  
382 contamination.

383

## 384 **RNA sequencing**

385 Non-strand specific, polyA-enriched RNA sequencing was performed as described earlier<sup>28</sup>.  
386 Briefly, RNA was isolated from whole-cell lysates using the AllPrep RNA Kit (Qiagen) and  
387 RNA integrity number (RIN) was determined with the Agilent 2100 BioAnalyzer (RNA 6000  
388 Nano Kit, Agilent). For library preparation, 1 µg of RNA was poly(A) selected, fragmented, and  
389 reverse transcribed with the Elute, Prime, Fragment Mix (Illumina). End repair, A-tailing,  
390 adaptor ligation, and library enrichment were performed as described in the Low Throughput  
391 protocol of the TruSeq RNA Sample Prep Guide (Illumina). RNA libraries were assessed for  
392 quality and quantity with the Agilent 2100 BioAnalyzer and the Quant-iT PicoGreen dsDNA  
393 Assay Kit (Life Technologies). RNA libraries were sequenced as 100 bp paired-end runs on an  
394 Illumina HiSeq2500 platform.

## 395 **Processing of RNA sequencing files**

396 RNA-seq reads were demultiplexed and mapped with STAR<sup>65</sup> (version 2.4.2a) to the hg19  
397 genome assembly (UCSC Genome Browser build). In addition to the default parameters we  
398 detected gene fusions and increased sensitivity for novel splice junctions (chimSegmentMin=20,  
399 twopassMode="Basic"). Analysis was restricted to the 27,682 UCSC Known Genes<sup>66</sup> (genome  
400 annotation version hg19) of chromosomes 1 to 22, M, X, or Y. Per gene, reads that are paired  
401 with mates from opposite strands and that overlapped completely within the gene on either strand  
402 orientation were counted using the *summarizeOverlaps* function of the R/Bioconductor  
403 GenomicAlignments<sup>67</sup> package (parameters: mode=intersectionStrict, singleEnd=FALSE,  
404 ignore.strand=TRUE, fragments=FALSE). If the 95th percentile of the coverage across all  
405 samples was below 10 reads the gene was considered "not expressed" and discarded from later  
406 analysis.

## 407 **Computing RNA fold changes and differential expression**

408 Before testing for differential expression between one patient of interest and all others, we  
409 controlled for technical *batch effect*, *sex*, and biopsy site as inferred from the expression of *hox*  
410 genes (Supplementary information, Supplementary Data 1). We modeled the RNA-seq read  
411 counts  $K_{i,j}$  of gene  $i$  in sample  $j$  with a generalized linear model using the R/Bioconductor  
412 DESeq2 package<sup>68,69</sup>:

$$K_{i,j} \sim NB(s_j \times q_{i,j}, \alpha_i)$$

$$\log_2(q_{i,j}) = \beta_i^0 + \beta_i^{condition} \mathbf{x}_{i,j}^{condition} + \beta_i^{batch} \mathbf{x}_{i,j}^{batch} + \beta_i^{sex} \mathbf{x}_{i,j}^{sex} + \beta_i^{hox} \mathbf{x}_{i,j}^{hox}$$

413 Where NB is the negative binomial distribution;  $\alpha_i$  is a gene specific dispersion parameter;  $s_j$   
414 is the size factor of sample  $j$ ;  $\beta_i^0$  is the intercept parameter for gene  $i$ . The value of  $\mathbf{x}_{i,j}^{condition}$  is 1  
415 for all RNA samples  $j$  of the patient of interest, thereby allowing for biological replicates, and 0  
416 otherwise. The resulting vector  $\beta_i^{condition}$  represents the log<sub>2</sub>-fold changes for one patient against  
417 all others. Z-scores were computed by dividing the fold changes by the standard deviation of the  
418 normalized expression level of the respective gene. The  $P$ -values corresponding to the

419  $\beta_i^{condition}$  were corrected for multiple testing using the Hochberg family-wise error rate  
420 method<sup>70</sup>.

### 421 **Detection of aberrant splicing**

422 The LeafCutter<sup>71</sup> software was utilized to detect aberrant splicing. Each patient was tested  
423 against all others. To adjust LeafCutter to the rare disease setting, we modified the parameters to  
424 detect rare clusters, capture local gene fusion events and to detect junctions unique to a patient  
425 (minclureads=30; maxintronlen=500,000; mincluratio=1e-5, Supplementary Data 5).  
426 Furthermore, one sample was tested against all other samples (min\_samples\_per\_group=1;  
427 min\_samples\_per\_intron=1). The resulting *P*-values were corrected for multiple testing using a  
428 family-wise error rate approach<sup>70</sup>.

429 The significant splice events (Hochberg adjusted *P*-value < 0.05) detected in the undiagnosed  
430 patients were visually classified as exon skipping, exon truncation, exon elongation, new exon,  
431 complex splicing (any other splicing event or a combination of the aforementioned ones) and  
432 false positives (n=73, Fig 3b). However, due to LeafCutter's restriction to split reads it is  
433 difficult to detect intron retention events, since in a perfect intron retention scenario no split-  
434 reads are present.

435 For further analysis, only reads spanning a splice junction, so called split reads, were  
436 extracted with a mapping quality of greater than 10 to reduce the false positive rate due to  
437 mapping issues. Each splice site was annotated as belonging to the start or end of a known exon  
438 or to be entirely new. For the reference exon annotation the GENCODE release 24 based on  
439 GRCh37 was used<sup>72</sup>. The percent spliced in ( $\Psi$ ) values for the 3' and 5' sites were calculated as  
440 described earlier<sup>37</sup>:

$$441 \quad \psi_5(D, A) = \frac{n(D, A)}{\sum_{A'} n(D, A')} \quad \text{and} \quad \psi_3(D, A) = \frac{n(D, A)}{\sum_{D'} n(D', A)}$$

442 Where *D* is a donor site and *A* is an acceptor site.  $n(D, A)$  denotes the number of reads  
443 spanning the given junction. *D'* and *A'* represent all possible donor and acceptor sites,  
444 respectively.

445 Classification of splice sites into background, weak and strong was done by modeling the  
446 distribution of the  $\psi_5$  and  $\psi_3$ -values with three components. Identifiability of the three  
447 components was facilitated by considering three groups of junctions depending on previous  
448 annotation of splice sites: 'no side is annotated', 'one side is annotated' and 'both sides are  
449 annotated'. Specifically, the number of split reads  $n(D, A)$  of a junction conditioned on the total  
450 number of reads  $N(D, A) = \sum_{A'} n(D, A')$ , for  $\psi_5$ , and  $N(D, A) = \sum_{D'} n(D', A)$ , for  $\psi_3$ , was  
451 modeled as:

$$P(n(D, A)|N(D, A)) = \sum_{c \in \{bg, wk, st\}} \sum_{s=0,1,2} \pi_{s,c} \text{BetaBin}(n(D, A)|N(D, A), \alpha_c, \beta_c)$$

452 where *c* is the component index, *s* the number of annotated sites and BetaBin the beta-  
453 binomial distribution. Hence, the components were modeled to have the same parameters  $\alpha_c, \beta_c$

454 in all three groups but their mixing proportions  $\pi_{s,c}$  to be group-specific. Fitting was performed  
455 using the expectation-maximization algorithm. For the initial step, the data points were classified  
456 as background ( $\psi < 0.001$ ), weak spliced ( $\psi < 0.1$ ) and canonical ( $\psi \geq 0.1$ ). After convergence of  
457 the clustering the obtained parameters were used to estimate the probability for each junction  
458 side to belong to a given class.

### 459 ***Detection of mono-allelic expression***

460 For mono-allelic expression analysis only heterozygous single nucleotide variants with only  
461 one alternative allele detected from exome sequencing data were used. The same quality filters  
462 were used as mentioned in the exome sequencing part, but no frequency filter was applied. To  
463 get allele counts from RNA sequencing for the remaining variants the function *pileLettersAt*  
464 from the R/Bioconductor package *GenomicAlignments*<sup>67</sup> was used. The data was further filtered  
465 for variants with coverage of at least 10 reads on the transcriptome.

466 The DESeq2 package<sup>68,69</sup> was applied on the final variant set to estimate the significance of  
467 the allele-specific expression. Allele-specific expression was estimated on each heterozygous  
468 variant independently of others (i.e. without phasing the variants). For each sample, a  
469 generalized linear model was fitted with the contrast of the coverage of one allele against the  
470 coverage of the other alleles (*condition*). Specifically, we modeled  $K_{i,j}$  the number of reads of  
471 variant  $i$  in sample  $j$  as:

$$K_{i,j} \sim NB(s_j \times q_{i,j}, \alpha)$$
$$\log_2(q_{i,j}) = \beta_i^0 + \beta_i^{condition} \mathbf{x}_{i,j}^{condition}$$

472 Where NB is the negative binomial distribution; the dispersion parameter  $\alpha$  was fixed for all  
473 variants to  $\alpha = 0.05$ , which is approximately the average dispersion over all samples based on  
474 the gene-wise analysis;  $s_j$  is the size factor of each condition;  $\beta_i^0$  is the intercept parameter for  
475 variant  $i$ . The value of  $\mathbf{x}_{i,j}^{condition}$  is 1 for the alternative alleles and 0 otherwise. The resulting  
476  $\beta_i^{condition}$  represents the  $\log_2$ -fold changes for the alternative allele against the reference allele.  
477 The independent filtering by DESeq2 was disabled (*independentFiltering=FALSE*) to keep the  
478 coverage outliers among the results. To classify a variant as mono-allelically expressed a cutoff  
479 of  $|\beta_i^{condition}| \geq 2$  was used, which corresponds to an allele frequency  $\geq 0.8$ , and we filtered  
480 Hochberg adjusted  $P$ -values to be smaller than 0.05.

### 481 ***Mass spectrometric sample preparation***

482 We performed quantitative proteomics from a second aliquot of cells taken at the same time  
483 as the RNA-seq aliquot. Mass spectrometric sample preparation was done as described earlier<sup>73</sup>.  
484 Briefly, cells were lysed in SDC lysis buffer (1% sodium deoxycholate, 10 mM TCEP, 40 mM  
485 CAA, 100 mM Tris pH 8.5), boiled for 10 min at 95°C, sonicated and diluted 1:1 with water for  
486 LysC and trypsin digestion. The dilution buffer contained appropriate amounts of proteolytic  
487 enzyme to ensure a ratio of 1:50 ( $\mu\text{g}$  enzyme /  $\mu\text{g}$  protein). Digestion was performed at 37°C  
488 overnight. Peptides were acidified, loaded on SDB-RPS (poly-styrenedivinylbenzene) material  
489 and eluted. Eluted peptides were collected in autosampler vials and dried using a SpeedVac



490 centrifuge (Eppendorf, Concentrator plus, 5305 000.304). Peptides were resuspended in buffer  
491 A\* (2% ACN, 0.1% TFA) and were sonicated (Branson Ultrasonics, Ultrasonic Cleaner Model  
492 2510).

### 493 ***Mass spectrometric data acquisition***

494 2 µg of peptides per sample were loaded for 100 min gradients separated on a 50 cm column  
495 with 75 µm inner diameter in-house packed with 1.9 µm C18 beads (Dr. Maisch GmbH).  
496 Reverse phase chromatography was performed at 50°C with an EASY-nLC 1000 ultra-high  
497 pressure system (Thermo Fisher Scientific) coupled to the Q Exactive HF<sup>74</sup> mass spectrometer  
498 (Thermo Fisher Scientific) via a nanoelectrospray source (Thermo Fisher Scientific). Peptides  
499 were loaded in buffer A (0.1% volume/volume formic acid) and eluted with a nonlinear gradient.  
500 Operational parameters were real-time monitored by the SprayQC software<sup>75</sup>. Raw files were  
501 analysed by the software MaxQuant<sup>76</sup> (version 1.5.3.2) and peak lists were searched against the  
502 Homo sapiens Uniprot FASTA database (Version 2014/4) and a common contaminants database  
503 (247 entries) by the Andromeda search engine<sup>77</sup>. Label-free quantification was done using the  
504 MaxLFQ algorithm<sup>78</sup> (for detailed parameters see Supplementary Table 5) integrated into  
505 MaxQuant.

### 506 ***Processing of proteome intensities***

507 The LFQ intensities and gene names were extracted for 6,566 protein groups from the  
508 MaxQuant output file *proteinGroups.txt*. For protein groups with more than one member, the  
509 first member was chosen to represent the group as single protein with a distinct gene name  
510 (similar to earlier studies<sup>79</sup>). MaxLFQ intensities of 0 actually represent non-quantified peaks  
511 and were therefore replaced with missing values (NA). The 10 samples that had a frequency of  
512 missing values higher than 50% were considered bad quality and were discarded. Furthermore,  
513 proteins were discarded because they had no gene name assigned (n=198), were not the most  
514 abundant among their duplicates (n=295), were not expressed in any sample (n=93), because  
515 their 95th percentile was not detected (n=549), which was also considered as not expressed,  
516 analogously to RNA filtering. Finally, 5,431 proteins and 31 samples were considered for further  
517 analysis (Supplementary Data 3).

### 518 ***Computing protein fold changes and differential expression***

519 Since the mass spectrometric measurements of all samples were done in a single run, no  
520 technical artifacts could be found with a hierarchical clustering. Protein differential expression  
521 for each patient compared to the others was tested using moderated T-test approach as  
522 implemented in the R/Bioconductor limma package<sup>80</sup>. The transcriptome covariates for sex and  
523 HOX effects were used in the linear model for normalization.

### 524 ***Transduction and Transfection***

525 Overexpression of *TIMMDC1* in fibroblast cell lines was performed by lentivirus-mediated  
526 expression of the full-length *TIMMDC1* cDNA (DNASU Plasmid Repository) using the  
527 ViraPower HiPerform Lentiviral TOPO Expression Kit (Thermo Fisher Scientific)<sup>81</sup>. *TIMMDC1*  
528 cDNA was cloned into the pLenti6.3/V5-TOPO expression vector and cotransfected into 293FT

529 cells with the packaging plasmid mix using Lipofectamine 2000. After 24 h, the transfection mix  
530 was replaced with high glucose DMEM supplemented with 10% FBS. After further 72 h, the  
531 viral particle containing supernatant was collected and used for transduction of the fibroblast cell  
532 lines. Selection of stably expressing cells was performed using 5 µg/mL Blasticidin (Thermo  
533 Fisher Scientific) for 2 weeks.

### 534 ***Immunoblotting***

535 Total fibroblast cell lysates were subjected to whole protein quantification, separated on 4-  
536 12% precast gels (Lonza) by SDS-PAGE electrophoresis and semi-dry transferred to PVDF  
537 membranes (GE Healthcare Life Sciences). The membranes were blocked in 5% non-fat milk  
538 (Bio Rad) in TBS-T for 1 h and immunoblotted using primary antibodies against CLPP (Abcam,  
539 ab56455), MCOLN1 (Abcam, ab28508), NDUFA13 (Abcam, ab110240), NDUFB3 (Abcam,  
540 ab55526), NDUFB8 (Abcam, ab110242), TIMMDC1 (Abcam, ab171978), and UQCRC2  
541 (Abcam, ab14745) for 1 h at RT or ON at 4°C. Signals were detected by incubation with HRP-  
542 conjugated goat anti-rabbit and goat anti-mouse secondary antibodies (Jackson Immuno  
543 Research Laboratories) for 1 h and visualized using ECL (GE Healthcare Life Sciences).

### 544 ***Blue native PAGE (BN-PAGE)***

545 Fresh fibroblast cell pellets were resuspended in PBS supplemented with 0.25 mM PMSF  
546 and 10 U/mL DNase I and solubilized using 2 mg digitonin/mg protein. The mixture was  
547 incubated on ice for 15 min followed by addition of 1 mL PBS and subsequent centrifugation for  
548 10 min at 10000 g and 4°C. The pellet was resuspended in 1x MB (750 mM ε-aminocaproic  
549 acid, 50 mM bis-Tris, 0.5 mM EDTA, pH 7.0) and subjected to whole protein quantification.  
550 Membrane proteins were solubilized at a protein concentration of 2 µg/µL using 0.5% (v/v) *n*-  
551 dodecyl-β-d-maltoside (DDM) for 1 h on ice and centrifuge for 30 min at 10000 g at 4°C. The  
552 supernatant was recovered and whole protein amount was quantified. Serva Blue G (SBG) was  
553 added to a final concentration of 0.25% (v/v) and 60 µg protein were loaded on NativePAGE 4-  
554 16% Bis-Tris gels (Thermo Fisher Scientific). Anode buffer contained 50 mM Bis-Tris, pH 7.0,  
555 blue cathode buffer contained 15 mM Bis-Tris, 50 mM Tricine, pH 7.0, 0.02% SBG.  
556 Electrophoresis was started at 40 V for 30 min and continued at 130 V until the front line  
557 proceeded 2/3 of the gel. Subsequently, blue cathode buffer was replaced by clear cathode buffer  
558 not containing SBG (15 mM Bis-Tris, 50 mM Tricine, pH 7.0). Proteins were wet transferred to  
559 PVDF membranes and immunoblotted using primary antibodies against NDUFB8 to visualize  
560 complex I and UQCRC2 to visualize complex III.

### 561 ***Proline supplementation growth assay***

562 We modified a method established earlier<sup>51</sup>. For the comparative growth assay, equal number  
563 of cells (n=250) from patient and control were seeded in 96-well plates and cultured in DMEM  
564 containing 10% of either normal or dialyzed FBS. Medium with normal FBS contains small  
565 molecules, whereas medium with dialyzed FBS is free of molecules with a molecular weight  
566 smaller than 10,000 mw (Proline-free medium). To confirm the effect of Proline deprivation,  
567 DMEM containing dialyzed FBS was supplemented with 100 µM L-Proline to rescue the growth  
568 defect. After paraformaldehyde fixation, nuclei were stained with 4',6-diamidino-2-phenylindole

569 (DAPI) and cell number was determined using a Cytation3 automated plate reader (BioTek,  
570 USA).

### 571 ***Cellular ROS production***

572 Intensity of hydroethidine (HET) oxidation products as a measure of cellular ROS production  
573 was quantified in living skin fibroblasts using epifluorescence microscopy as described  
574 previously<sup>82</sup>.

### 575 ***References***

- 576 1. Chong, J. X. *et al.* The Genetic Basis of Mendelian Phenotypes: Discoveries, Challenges,  
577 and Opportunities. *Am. J. Hum. Genet.* **97**, 199–215 (2015).
- 578 2. O'Donnell-Luria, A. H. & Miller, D. T. A Clinician's perspective on clinical exome  
579 sequencing. *Human Genetics* **135**, 643–654 (2016).
- 580 3. Shashi, V. *et al.* The utility of the traditional medical genetics diagnostic evaluation in the  
581 context of next-generation sequencing for undiagnosed genetic disorders. *Genet. Med.* **16**,  
582 176–182 (2014).
- 583 4. Ankala, A. *et al.* A comprehensive genomic approach for neuromuscular diseases gives a  
584 high diagnostic yield. *Ann. Neurol.* **77**, 206–214 (2015).
- 585 5. Taylor, R. W. *et al.* Use of Whole-Exome Sequencing to Determine the Genetic Basis of  
586 Multiple Mitochondrial Respiratory Chain Complex Deficiencies. *Jama* **312**, 68 (2014).
- 587 6. Lieber, D. S. *et al.* Targeted exome sequencing of suspected mitochondrial disorders.  
588 *Neurology* **80**, 1762–1770 (2013).
- 589 7. 1000 Genomes Project Consortium *et al.* A global reference for human genetic variation.  
590 *Nature* **526**, 68–74 (2015).
- 591 8. Sudmant, P. H. *et al.* An integrated map of structural variation in 2,504 human genomes.  
592 *Nature* **526**, 75–81 (2015).
- 593 9. Taylor, J. C. *et al.* Factors influencing success of clinical genome sequencing across a  
594 broad spectrum of disorders. *Nat. Genet.* **47**, 717–726 (2015).
- 595 10. Li, X. *et al.* The impact of rare variation on gene expression across tissues. *bioRxiv* 1–22  
596 (2016). doi:10.1101/074443
- 597 11. Zeng, Y. *et al.* Aberrant Gene Expression in Humans. *PLoS Genet.* **11**, 1–20 (2015).
- 598 12. Guan, J. *et al.* Exploiting aberrant mRNA expression in autism for gene discovery and  
599 diagnosis. *Hum. Genet.* **135**, 1–15 (2016).

- 600 13. Zhao, J. *et al.* A Burden of Rare Variants Associated with Extremes of Gene Expression in  
601 Human Peripheral Blood. *Am. J. Hum. Genet.* **98**, 299–309 (2016).
- 602 14. Albers, C. a *et al.* Compound inheritance of a low-frequency regulatory SNP and a rare  
603 null mutation in exon-junction complex subunit RBM8A causes TAR syndrome. *Nat.*  
604 *Genet.* **44**, 435–9, S1-2 (2012).
- 605 15. Reinius, B. & Sandberg, R. Random monoallelic expression of autosomal genes:  
606 stochastic transcription and allele-level regulation. *Nat. Rev. Genet.* **16**, 653–664 (2015).
- 607 16. Eckersley-Maslin, M. A. & Spector, D. L. Random monoallelic expression: Regulating  
608 gene expression one allele at a time. *Trends Genet.* **30**, 237–244 (2014).
- 609 17. Tazi, J., Bakkour, N. & Stamm, S. Alternative splicing and disease. *Biochimica et*  
610 *Biophysica Acta - Molecular Basis of Disease* **1792**, 14–26 (2009).
- 611 18. Scotti, M. M. & Swanson, M. S. RNA mis-splicing in disease. *Nat. Rev. Genet.* **17**, 19–32  
612 (2015).
- 613 19. Singh, R. K. & Cooper, T. A. Pre-mRNA splicing in disease and therapeutics. *Trends Mol.*  
614 *Med.* **18**, 472–482 (2012).
- 615 20. Xiong, H. Y. *et al.* The human splicing code reveals new insights into the genetic  
616 determinants of disease. *Science (80-. )*. **347**, 1254806–1254806 (2015).
- 617 21. Muntoni, F., Torelli, S. & Ferlini, A. Dystrophin and mutations: one gene, several  
618 proteins, multiple phenotypes. *Lancet. Neurol.* **2**, 731–40 (2003).
- 619 22. Gonorazky, H. *et al.* RNAseq analysis for the diagnosis of muscular dystrophy. *Ann. Clin.*  
620 *Transl. Neurol.* **3**, 55–60 (2016).
- 621 23. Morel, C. F. *et al.* A LMNA Splicing Mutation in Two Sisters with Severe Dunnigan-  
622 Type Familial Partial Lipodystrophy Type 2. *J. Clin. Endocrinol. Metab.* **91**, 2689–2695  
623 (2006).
- 624 24. Qu, Y. *et al.* A rare variant (c.863G>T) in exon 7 of SMN1 disrupts mRNA splicing  
625 and is responsible for spinal muscular atrophy. *Eur. J. Hum. Genet.* **24**, 864–870 (2016).
- 626 25. Gorman, G. S. *et al.* Mitochondrial diseases. *Nat. Rev. Dis. Prim.* **2**, 16080 (2016).
- 627 26. Elstner, M., Andreoli, C. & Ahting, U. Mitop2: an integrative tool for the analysis of the  
628 mitochondrial proteome. *Mol. Biotechnol.* **40**, 306–315 (2008).
- 629 27. Mayr, J. A. *et al.* Spectrum of combined respiratory chain defects. *J. Inherit. Metab. Dis.*  
630 **38**, 629–640 (2015).
- 631 28. Haack, T. B. *et al.* ELAC2 mutations cause a mitochondrial RNA processing defect  
632 associated with hypertrophic cardiomyopathy. *Am. J. Hum. Genet.* **93**, 211–223 (2013).



- 633 29. Haack, T. B. *et al.* Exome sequencing identifies ACAD9 mutations as a cause of complex  
634 I deficiency. *Nat. Genet.* **42**, 1131–4 (2010).
- 635 30. Li, Y. I. *et al.* RNA splicing is a primary link between genetic variation and disease.  
636 *Science* **352**, 600–4 (2016).
- 637 31. Zhang, B. *et al.* Proteogenomic characterization of human colon and rectal cancer. *Nature*  
638 **513**, 382–387 (2014).
- 639 32. Liu, Y., Beyer, A. & Aebersold, R. On the Dependency of Cellular Protein Levels on  
640 mRNA Abundance. *Cell* **165**, 535–550 (2016).
- 641 33. Lee, K. K., Shimoji, M., Hossain, Q. S., Sunakawa, H. & Aniya, Y. Novel function of  
642 glutathione transferase in rat liver mitochondrial membrane: role for cytochrome c release  
643 from mitochondria. *Toxicol. Appl. Pharmacol.* **232**, 109–18 (2008).
- 644 34. Holzerova, E. *et al.* Human thioredoxin 2 deficiency impairs mitochondrial redox  
645 homeostasis and causes early-onset neurodegeneration. *Brain* **139**, 346–54 (2016).
- 646 35. Guarani, V. *et al.* TIMMDC1/C3orf1 Functions as a Membrane-Embedded Mitochondrial  
647 Complex I Assembly Factor through Association with the MCIA Complex. *Mol. Cell.*  
648 *Biol.* **34**, 847–861 (2014).
- 649 36. Andrews, B., Carroll, J., Ding, S., Fearnley, I. M. & Walker, J. E. Assembly factors for  
650 the membrane arm of human complex I. *Proc. Natl. Acad. Sci. U. S. A.* **110**, 18934–9  
651 (2013).
- 652 37. Pervouchine, D. D., Knowles, D. G. & Guig, R. Intron-centric estimation of alternative  
653 splicing from RNA-seq data. *Bioinformatics* **29**, 273–274 (2013).
- 654 38. Lek, M. *et al.* Analysis of protein-coding genetic variation in 60,706 humans. *Nature* **536**,  
655 285–91 (2016).
- 656 39. Halperin, T., Zheng, B., Itzhaki, H., Clarke, A. K. & Adam, Z. Plant mitochondria contain  
657 proteolytic and regulatory subunits of the ATP-dependent Clp protease. *Plant Mol. Biol.*  
658 **45**, 461–468 (2001).
- 659 40. Jenkinson, E. M. *et al.* Perrault Syndrome Is Caused by Recessive Mutations in CLPP,  
660 Encoding a Mitochondrial ATP-Dependent Chambered Protease. *Am. J. Hum. Genet.* **92**,  
661 605–613 (2013).
- 662 41. Jenkinson, E. M. *et al.* Perrault syndrome: further evidence for genetic heterogeneity. *J.*  
663 *Neurol.* **259**, 974–976 (2012).
- 664 42. Szczepanowska, K. *et al.* CLPP coordinates mitoribosomal assembly through the  
665 regulation of ERAL1 levels. *EMBO J.* **35**, 2566–2583 (2016).
- 666 43. Piva, F., Giulietti, M., Burini, A. B. & Principato, G. SpliceAid 2: a database of human

- 667 splicing factors expression data and RNA target motifs. *Hum. Mutat.* **33**, 81–5 (2012).
- 668 44. Dogan, R. I., Getoor, L., Wilbur, W. J. & Mount, S. M. SplicePort--an interactive splice-  
669 site analysis tool. *Nucleic Acids Res.* **35**, W285-91 (2007).
- 670 45. Timmermans, M. J. T. N. *et al.* Why barcode? High-throughput multiplex sequencing of  
671 mitochondrial genomes for molecular systematics. *Nucleic Acids Res.* **38**, e197–e197  
672 (2010).
- 673 46. Desmet, F.-O. *et al.* Human Splicing Finder: an online bioinformatics tool to predict  
674 splicing signals. *Nucleic Acids Res.* **37**, e67 (2009).
- 675 47. Yeo, G., Hoon, S., Venkatesh, B. & Burge, C. B. Variation in sequence and organization  
676 of splicing regulatory elements in vertebrate genes. *Proc. Natl. Acad. Sci. U. S. A.* **101**,  
677 15700–5 (2004).
- 678 48. Burge, C. & Karlin, S. Prediction of complete gene structures in human genomic DNA. *J.*  
679 *Mol. Biol.* **268**, 78–94 (1997).
- 680 49. Kapustin, Y. *et al.* Cryptic splice sites and split genes. *Nucleic Acids Res.* **39**, 5837–5844  
681 (2011).
- 682 50. Adams, E. & Frank, L. Metabolism of Proline and the Hydroxyprolines. *Annu. Rev.*  
683 *Biochem.* **49**, 1005–1061 (1980).
- 684 51. Baumgartner, M. R. *et al.* Hyperammonemia with reduced ornithine, citrulline, arginine  
685 and proline: a new inborn error caused by a mutation in the gene encoding delta(1)-  
686 pyrroline-5-carboxylate synthase. *Hum. Mol. Genet.* **9**, 2853–8 (2000).
- 687 52. Fischer-Zirnsak, B. *et al.* Recurrent De Novo Mutations Affecting Residue Arg138 of  
688 Pyrroline-5-Carboxylate Synthase Cause a Progeroid Form of Autosomal-Dominant Cutis  
689 Laxa. *Am. J. Hum. Genet.* **97**, 483–92 (2015).
- 690 53. Coutelier, M. *et al.* Alteration of ornithine metabolism leads to dominant and recessive  
691 hereditary spastic paraplegia. *Brain* **138**, 2191–205 (2015).
- 692 54. Sibley, C. R., Blazquez, L. & Ule, J. Lessons from non-canonical splicing. *Nat. Rev.*  
693 *Genet.* **17**, 407–21 (2016).
- 694 55. Cummings, B. B. *et al.* Improving genetic diagnosis in Mendelian disease with  
695 transcriptome sequencing. *bioRxiv* (2016). doi:10.1101/074153
- 696 56. Gibson, G. Human genetics. GTEx detects genetic effects. *Science* **348**, 640–1 (2015).
- 697 57. Vafai, S. B. & Mootha, V. K. Mitochondrial disorders as windows into an ancient  
698 organelle. *Nature* **491**, 374–83 (2012).
- 699 58. Gagneur, J. *et al.* Genotype-Environment Interactions Reveal Causal Pathways That

- 700 Mediate Genetic Effects on Phenotype. *PLoS Genet.* **9**, e1003803 (2013).
- 701 59. Mayr, J. A. *et al.* Lack of the mitochondrial protein acylglycerol kinase causes sengers  
702 syndrome. *Am. J. Hum. Genet.* **90**, 314–320 (2012).
- 703 60. Li, H. & Durbin, R. Fast and accurate short read alignment with Burrows-Wheeler  
704 transform. *Bioinformatics* **25**, 1754–1760 (2009).
- 705 61. Li, H. A statistical framework for SNP calling, mutation discovery, association mapping  
706 and population genetical parameter estimation from sequencing data. *Bioinformatics* **27**,  
707 2987–2993 (2011).
- 708 62. Li, H. *et al.* The Sequence Alignment/Map format and SAMtools. *Bioinformatics* **25**,  
709 2078–2079 (2009).
- 710 63. McLaren, W. *et al.* Deriving the consequences of genomic variants with the Ensembl API  
711 and SNP Effect Predictor. *Bioinformatics* **26**, 2069–2070 (2010).
- 712 64. Eilbeck, K. *et al.* The Sequence Ontology: a tool for the unification of genome  
713 annotations. *Genome Biol.* **6**, R44 (2005).
- 714 65. Dobin, A. *et al.* STAR: Ultrafast universal RNA-seq aligner. *Bioinformatics* **29**, 15–21  
715 (2013).
- 716 66. Hsu, F. *et al.* The UCSC Known Genes. *Bioinformatics* **22**, 1036–1046 (2006).
- 717 67. Lawrence, M. *et al.* Software for Computing and Annotating Genomic Ranges. *PLoS*  
718 *Comput. Biol.* **9**, e1003118 (2013).
- 719 68. Anders, S. & Huber, W. DESeq: Differential expression analysis for sequence count data.  
720 *Genome Biol.* **11**, R106 (2010).
- 721 69. Love, M. I., Huber, W. & Anders, S. Moderated estimation of fold change and dispersion  
722 for RNA-seq data with DESeq2. *Genome Biol.* **15**, 550 (2014).
- 723 70. Hochberg, Y. A sharper bonferroni procedure for multiple tests of significance.  
724 *Biometrika* **75**, 800–802 (1988).
- 725 71. Li, Y. I., Knowles, D. A. & Pritchard, J. K. LeafCutter: Annotation-free quantification of  
726 RNA splicing. *bioRxiv* 44107 (2016). doi:10.1101/044107
- 727 72. Harrow, J. *et al.* GENCODE: The reference human genome annotation for The ENCODE  
728 Project. *Genome Res.* **22**, 1760–1774 (2012).
- 729 73. Kulak, N. A., Pichler, G., Paron, I., Nagaraj, N. & Mann, M. Minimal, encapsulated  
730 proteomic-sample processing applied to copy-number estimation in eukaryotic cells. *Nat.*  
731 *Methods* **11**, 319–324 (2014).
- 732 74. Scheltema, R. A. *et al.* The Q Exactive HF, a Benchtop mass spectrometer with a pre-

- 733 filter, high-performance quadrupole and an ultra-high-field Orbitrap analyzer. *Mol. Cell.*  
734 *Proteomics* **13**, 3698–708 (2014).
- 735 75. Scheltema, R. A. & Mann, M. SprayQc: A Real-Time LC-MS/MS quality monitoring  
736 system to maximize uptime using off the shelf components. *J. Proteome Res.* **11**, 3458–  
737 3466 (2012).
- 738 76. Cox, J. & Mann, M. MaxQuant enables high peptide identification rates, individualized  
739 p.p.b.-range mass accuracies and proteome-wide protein quantification. *Nat. Biotechnol.*  
740 **26**, 1367–72 (2008).
- 741 77. Cox, J. *et al.* Andromeda: A peptide search engine integrated into the MaxQuant  
742 environment. *J. Proteome Res.* **10**, 1794–1805 (2011).
- 743 78. Cox, J., Hein, M. Y., Lubner, C. a & Paron, I. Accurate proteome-wide label-free  
744 quantification by delayed normalization and maximal peptide ratio extraction, termed  
745 MaxLFQ. *Mol. Cell. ...* **13**, 2513–2526 (2014).
- 746 79. Cheng, Z. *et al.* Differential dynamics of the mammalian mRNA and protein expression  
747 response to misfolding stress. *Mol. Syst. Biol.* **12**, 855–855 (2016).
- 748 80. Ritchie, M. E. *et al.* Limma powers differential expression analyses for RNA-sequencing  
749 and microarray studies. *Nucleic Acids Res.* **43**, e47 (2015).
- 750 81. Van Haute, L. *et al.* Deficient methylation and formylation of mt-tRNA(Met) wobble  
751 cytosine in a patient carrying mutations in NSUN3. *Nat. Commun.* **7**, 12039 (2016).
- 752 82. Forkink, M., Smeitink, J. a M., Brock, R., Willems, P. H. G. M. & Koopman, W. J. H.  
753 Detection and manipulation of mitochondrial reactive oxygen species in mammalian cells.  
754 *Biochim. Biophys. Acta* **1797**, 1034–44 (2010).

755

## 756 **Acknowledgements**

757 We are grateful to the participating families. Further we thank Dr. Lina Florentin for  
758 providing DNA samples of the parents of #35791. This study was supported by the German  
759 Bundesministerium für Bildung und Forschung (BMBF) through the E-Rare project GENOMIT  
760 (01GM1603 and 01GM1207, HP and TM, FWF I 920-B13 for JAM, and J41J11000420001 for  
761 DG), through the Juniorverbund in der Systemmedizin “mitOmics” (FKZ 01ZX1405A, JG, and  
762 FKZ 01ZX1405C, TBH), and the DZHK (German Centre for Cardiovascular Research, LSK,  
763 TM). The study was furthermore supported by the Deutsche Forschungsgemeinschaft (German  
764 Research Foundation) within the framework of the Munich Cluster for Systems Neurology (EXC  
765 1010 SyNergyDFG, TM) and a Fellowship through the Graduate School of Quantitative  
766 Biosciences Munich (QBM) supports DMB. HP, VT, and JAM are supported by EU FP7  
767 Mitochondrial European Educational Training Project (317433). CM, JG and HP are supported



768 by EU Horizon2020 Collaborative Research Project SOUND (633974). RWT is supported by a  
769 Wellcome Trust Strategic Award (096919/Z/11/Z) and the MRC Centre for Neuromuscular  
770 Diseases (G0601943). DG is supported by Telethon-Italy (GGP15041). We thank the Pierfranco  
771 and Luisa Mariani Foundation and the Cell lines and DNA Bank of Paediatric Movement  
772 Disorders and Mitochondrial Diseases of the Telethon Genetic Biobank Network (GTB09003).

### 773 ***Author contributions***

774 Project planning: T.M., J.G., H.P. Experimental design: H.P. Review of phenotypes, sample  
775 collection and biochemical analysis: C.L., B.F., A.D., V.T., A.L., D.G., R.T., D.G., J.A.M., A.R.,  
776 P.F., F.D., and T.M. Investigation L.S.K., D.M.B., and C.M. Data curation and analysis: L.S.K.,  
777 D.M.B., C.M., T.M.S., and H.P. Cell biology experiments: L.S.K., R.K., A.I., C.T., E.K., and  
778 B.R. Exome, genome, and RNA sequencing: L.S.K., R.K., E.G., T.S., P.L. and T.M.S. Exome  
779 analysis: L.S.K., R.K., T.B.H., and H.P. Quantitative proteomics: L.S.K. and G.P. Metabolomic  
780 studies: L.S.K., G.K., and J.A. Manuscript writing: L.S.K., D.M.B., C.M., J.G., and H.P.  
781 Visualization L.S.K., D.M.B., and C.M. Critical revision of the manuscript: all authors.

### 782 ***Competing financial interests***

783 The authors declare that they have no competing interests.

### 784 ***Materials & Correspondence***

785 Correspondence and material requests should be addressed to: Holger Prokisch  
786 (prokisch@helmholtz-muenchen.de) or Julien Gagneur (gagneur@in.tum.de).

787 Supplementary tables and R code to reproduce paper figures are available online at our  
788 webserver (<https://i12g-gagneurweb.in.tum.de/public/paper/mitoMultiOmics>).

### 789 ***Figure Legends***

#### 790 ***Figure 1: Strategy for genetic diagnosis using RNA-seq***

791 The approach we followed started with RNA sequencing of fibroblasts from unsolved WES  
792 patients. Three strategies to facilitate diagnosis were pursued: Detection of aberrant expression  
793 (e.g. depletion), aberrant splicing (e.g. exon creation) and mono-allelic expression of the  
794 alternative allele (i.e. A as alternative allele). Candidates were validated by proteomic  
795 measurements, lentiviral transduction of the wildtype (wt) allele or, in particular cases, by  
796 specific metabolic supplementation.

#### 797 ***Figure 2: RNA expression outlier detection and validation***

798 (a) Aberrantly expressed genes (Hochberg corrected  $P$ -value  $< 0.05$  and  $|Z$ -score $| > 3$ ) for  
799 each patient fibroblasts.

800 (b) Gene-wise RNA expression volcano plot of nominal  $P$ -values ( $-\log_{10} P$ -value) against  $Z$ -  
801 scores of the patient #35791 compared against all other fibroblasts. Absolute  $Z$ -scores greater  
802 than 5 are plotted at  $\pm 5$ , respectively.

803 (c) Same as (b) for patient #73804.

804 (d) Sample-wise RNA expression is ranked for the genes *TIMMDC1* (top) and *MGST1*  
805 (bottom). Samples with aberrant expression for the corresponding gene are highlighted in red  
806 (#73804, #35791, and #66744).

807 (e) Gene-wise comparison of RNA and protein fold changes of patient #35791 against all  
808 other fibroblast cell lines. Subunits of the mitochondrial respiratory chain complex I are  
809 highlighted (red squares). Reliably detected proteins that were not detected in this sample are  
810 shown separately with their corresponding RNA fold changes (points below solid horizontal  
811 line).

812 (f) Western blot of *TIMMDC1*, *NDUFA13*, *NDUFB3*, and *NDUFB8* protein in three  
813 fibroblast cell lines without (#62346, #91324, #NHDF) and three with a variant in *TIMMDC1*  
814 (#35791, #66744, #96687), and fibroblasts re-expressing *TIMMDC1* (“-T”) (#35791-T, #66744-  
815 T, #96687-T). UQCRC2 was used as loading control. MW, molecular weight; CI, complex I  
816 subunit; CIII, complex III subunit.

817 (g) Blue native PAGE blot of the control fibroblasts re-expressing *TIMMDC1* (NHDF-T),  
818 the control fibroblasts (NHDF), patient fibroblasts (#96687), and patient fibroblast re-expressing  
819 *TIMMDC1* (#96687-T). Immunodecoration for complex I and complex III was performed using  
820 *NDUFB8* and *UQCRC2* antibodies, respectively. CI, complex I subunit; CIII, complex III  
821 subunit.

### 822 **Figure 3: Aberrant splicing detection and quantification**

823 (a) Aberrant splicing events (Hochberg corrected  $P$ -value  $< 0.05$ ) for all fibroblasts.

824 (b) Aberrant splicing events ( $n=175$ ) grouped by their splicing category in undiagnosed patients  
825 ( $n=48$ ) after manual inspection.

826 (c) *CLPP* Sashimi plot of exon skipping and truncation events in affected and unaffected  
827 fibroblasts (red and orange, respectively). The RNA coverage is given as the  $\log_{10}$  RPKM-value  
828 and the number of split reads spanning the given intron is indicated on the exon-connecting lines.  
829 At the bottom the gene model of the RefSeq annotation is depicted. The aberrantly spliced exon  
830 is colored in red.

831 (d) Same as in (c) for *TIMMDC1*. At the bottom the newly created exon is depicted in red  
832 within the RefSeq annotation track.

833 (e) Coverage tracks (light red) for patients #35791, #66744, and #91324 based on RNA and  
834 whole genome sequencing. For patient #91324 only WGS is available. The homozygous SNV  
835 c.596+2146A>G is present in all coverage tracks (vertical orange bar). The top tracks show the  
836 genomic annotation: genomic position on chromosome 3, DNA sequence, amino acid translation  
837 (grey, stop codon in red), the RefSeq gene model (blue line), the predominant additional exon of  
838 *TIMMDC1* (blue rectangle), and the SNV annotation of the 1000 Genomes Project (each black  
839 bar represents one variant).

840 (f) Percent spliced in ( $\Psi$ ) distribution for different splicing classes and genes. Top:  
841 Histogram giving the genome-wide distribution of the 3' and 5'  $\Psi$ -values based on all reads over  
842 all samples. Middle: The shaded horizontal bars represent the densities (black for high density)  
843 of the background, weak and strong splicing class, respectively (Methods). Bottom:  $\Psi$ -values of  
844 the predominant donor and acceptor splice sites of genes with private splice sites (i.e found  
845 dominant in at most two samples) computed over all other samples.

#### 846 **Figure 4: Detection and validation of mono-allelic expression of rare variants**

847 (a) Distribution of heterozygous single nucleotide variants (SNVs) across samples for  
848 different consecutive filtering steps. Heterozygous SNVs detected by exome sequencing (black),  
849 SNVs with RNA-seq coverage of at least 10 reads (gray), SNVs where the alternative allele is  
850 mono-allelically expressed (alternative allele frequency > 0.8 and Benjamini-Hochberg corrected  
851  $P$ -value < 0.05, blue), and the rare subset of those (ExAC minor allele frequency < 0.001, red).

852 (b) Fold change between alternative (ALT+1) and reference (REF+1) allele read counts for  
853 the patient #80256 compared to total read counts per SNV within the sample. Points are colored  
854 according to the groups defined in (a).

855 (c) Gene-wise comparison of RNA and protein fold changes of the patient #80256 against all  
856 other patients' fibroblasts. The position of the gene *ALDH18A1* is highlighted. Reliably detected  
857 proteins that were not detected in this sample are shown separately with their corresponding  
858 RNA fold changes (points below solid horizontal line).

859 (d) Relative intensity for metabolites of the proline biosynthesis pathway (inlet) for the  
860 patient #80256 and 16 healthy controls of matching age. Equi-tailed 95% interval (whiskers),  
861 25th, 75th percentile (boxes) and median (bold horizontal line) are indicated. Data points  
862 belonging to the patient are highlighted (red circles and triangles, if Student's  $t$ -test  $P$ -value <  
863 0.05).

864 (e) Cell counts under different growth conditions for the normal human dermal fibroblast  
865 (NHDF) and patient #80256. Both fibroblasts were grown in fetal bovine serum (FBS), dialyzed  
866 FBS (without proline) and dialyzed FBS with proline added. Boxplot as in (d).  $P$ -values are  
867 based on a two-sided Wilcoxon test.

868 (f) Intron retention for *MCOLN1* in patient #62346. Tracks from top to bottom: genomic  
869 position on chromosome 19, amino acid translation (red for stop codons), RefSeq gene model,  
870 coverage of whole exome sequencing of patient #62346, RNA-seq based coverage for patients

871 #62346 and #85153 (red and orange shading, respectively). SNVs are indicated by non-reference  
872 colored bars with respect to the corresponding reference and alternative nucleotide.

873 ***Figure 5: Validation summary***

874 (a) Discovery and validation of genes with RNA defects in newly diagnosed patients, i.e.  
875 *TIMMDC1* (n=2 patients), *CLPP*, *ALDH18A1*, and *MCOLN1*, and patients with strong  
876 candidates, i.e. *MGST1*. The median number ( $\pm$  median absolute deviation) of candidate genes is  
877 given per detection strategies. Dotted check, manual inspection not statistically significant.

878 (b) Schematic representation of variant causing splicing defects for *TIMMDC1* (top, new  
879 exon red box), *CLPP* (middle, exon skipping and truncation), and *MCOLN1* (bottom, intron  
880 retention). Variants are depicted by a red star.

881

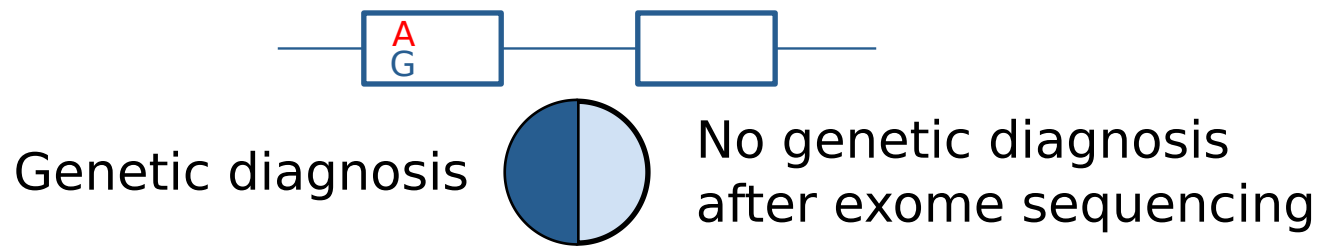

### 1. Patient fibroblasts (n=105)

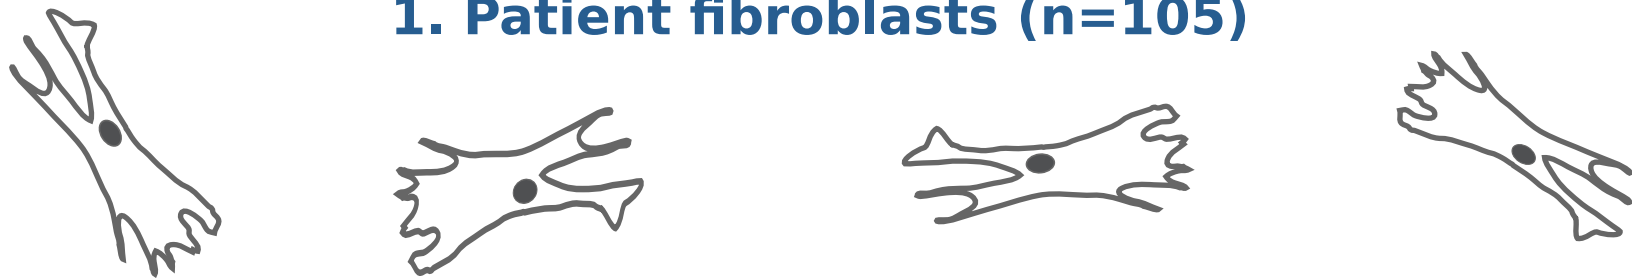

### 2. RNA sequencing

Aberrant expression

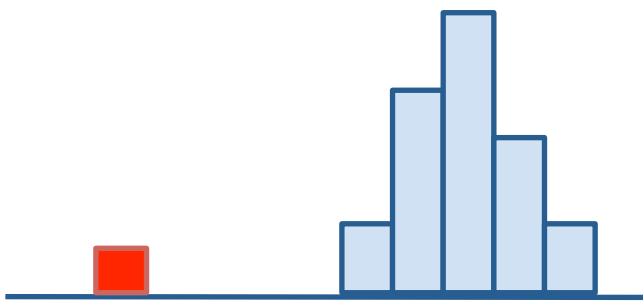

Aberrant splicing

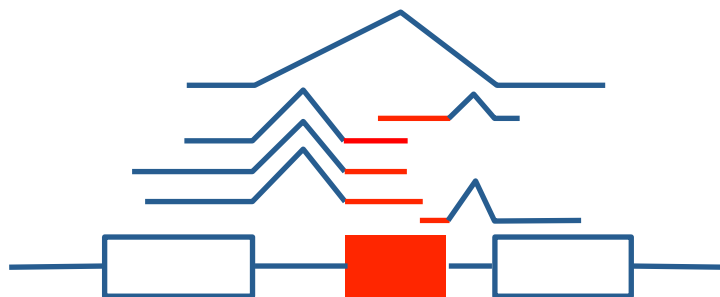

Mono-allelic expression

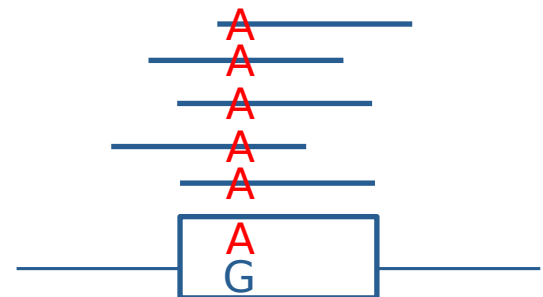

### 3. Functional and biochemical validation

Proteomics

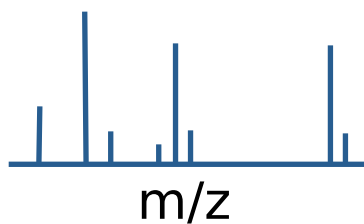

Complementation

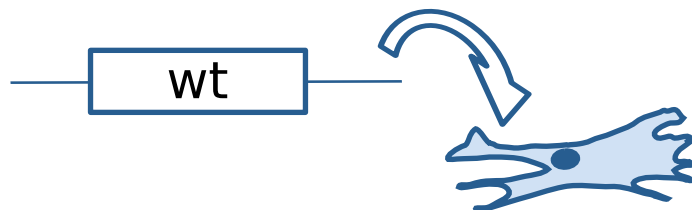

Supplementation

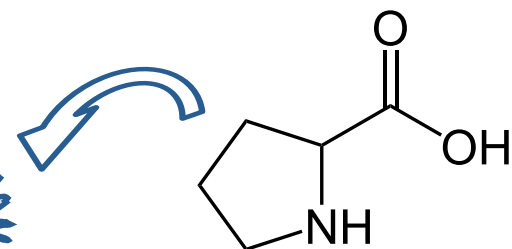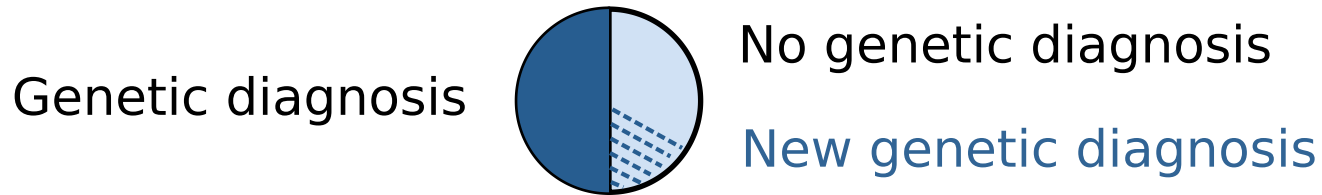



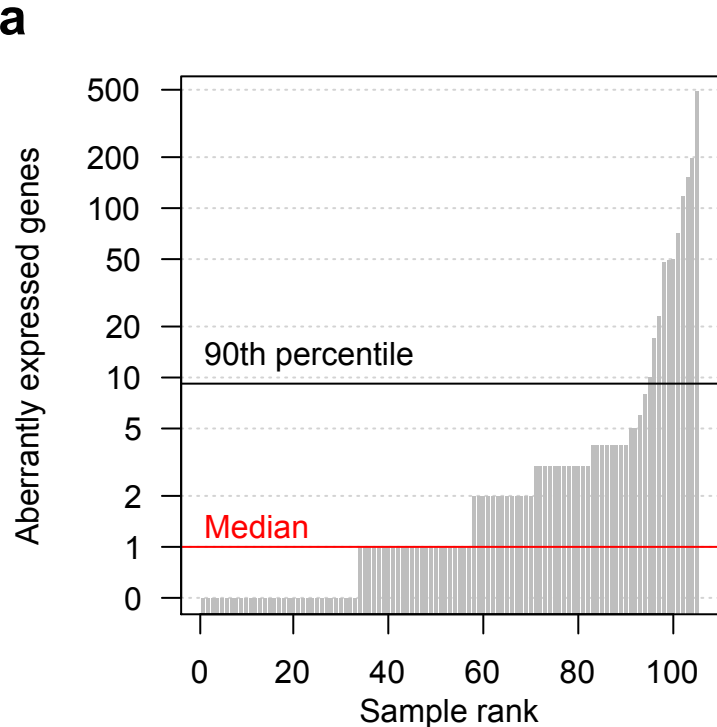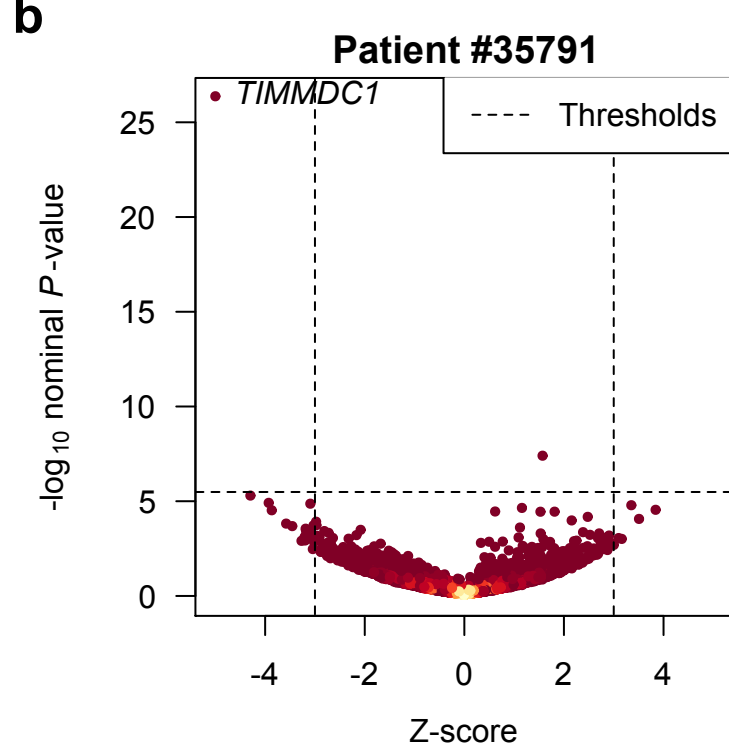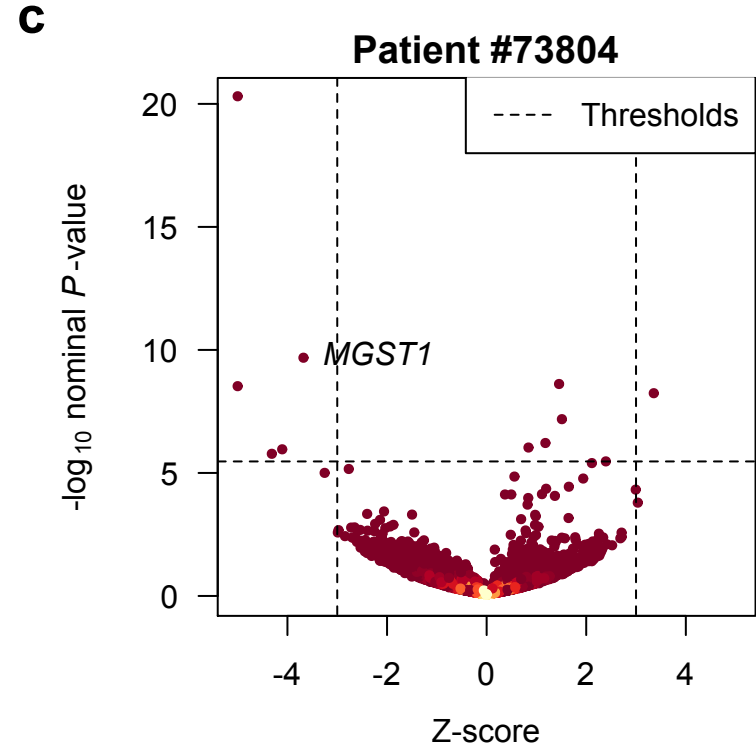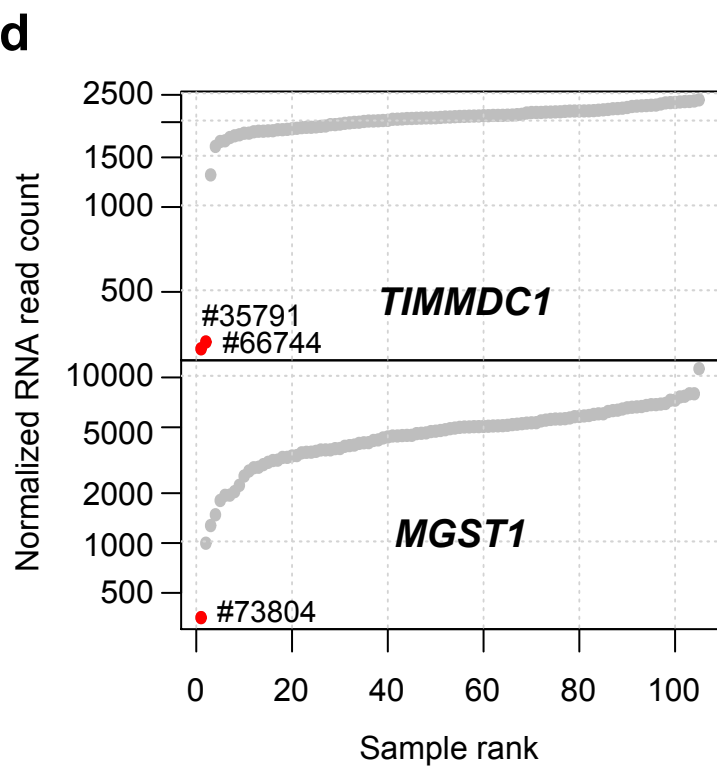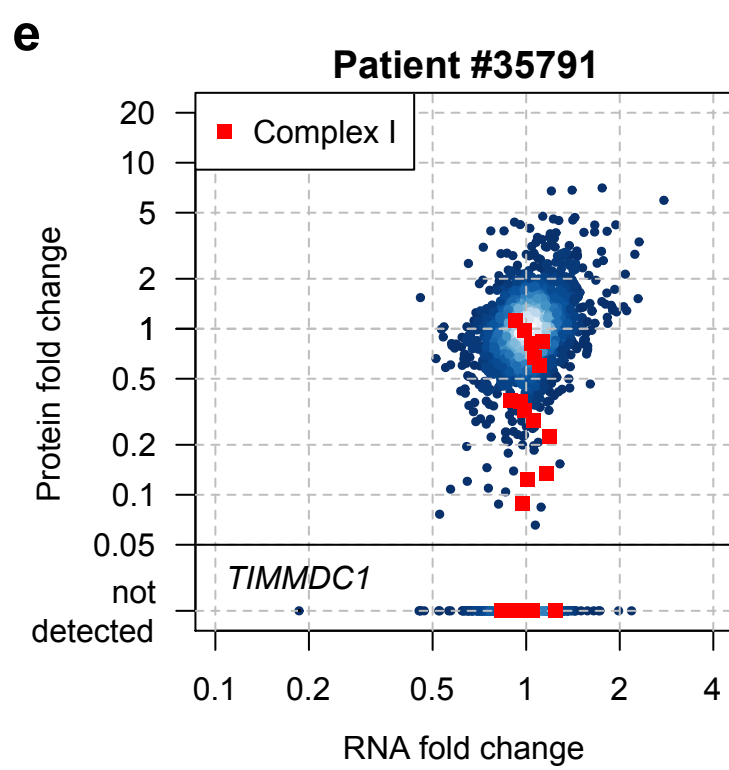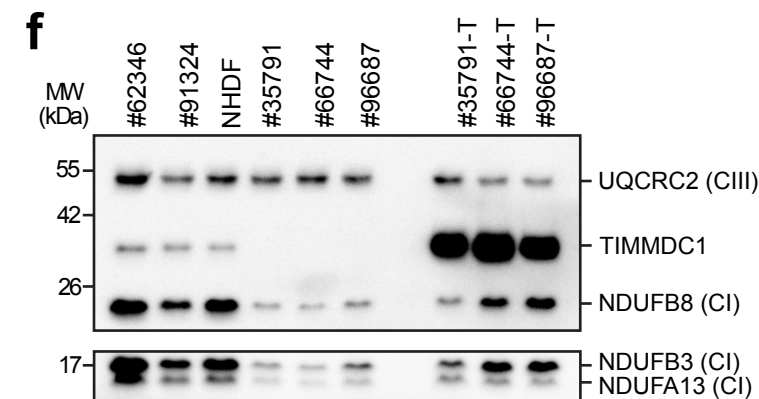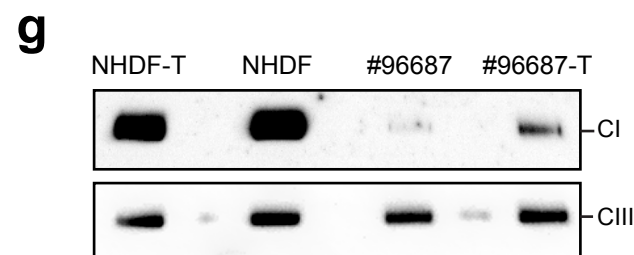

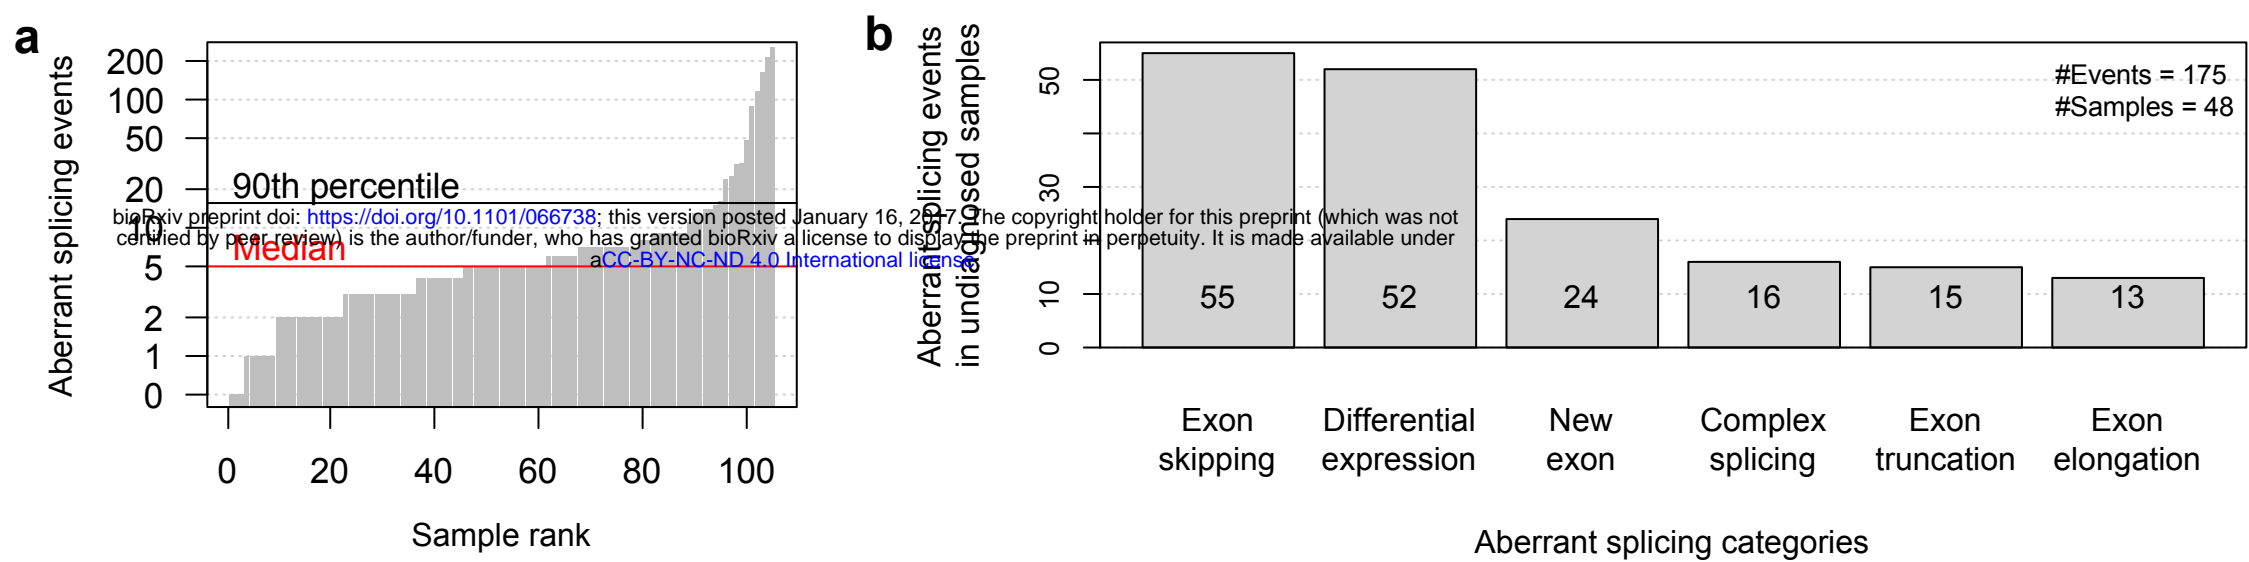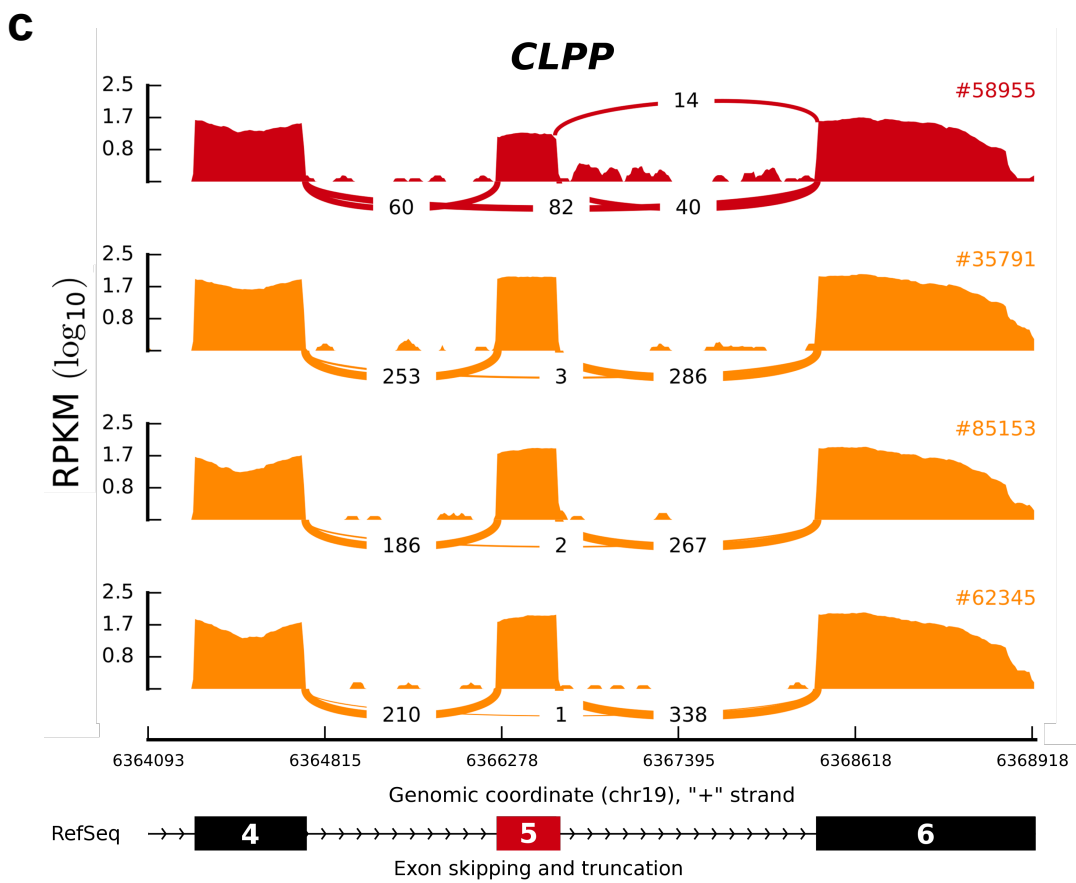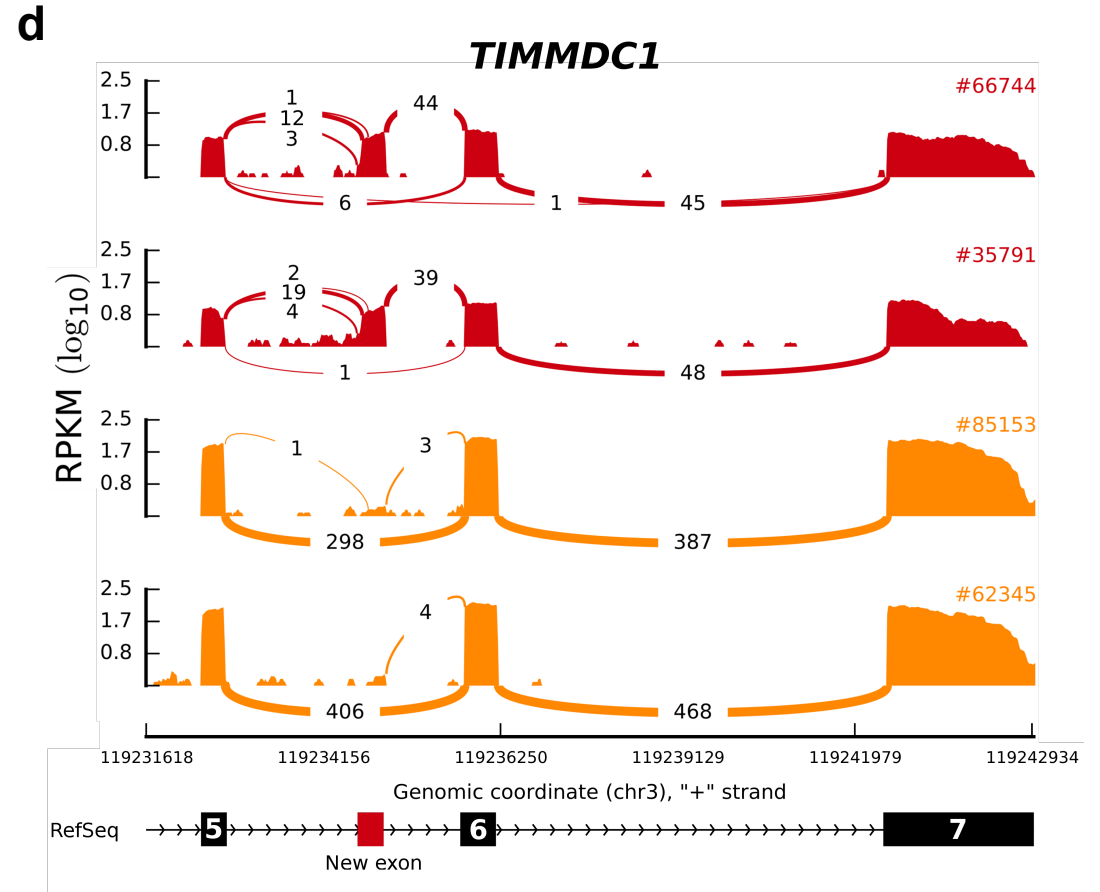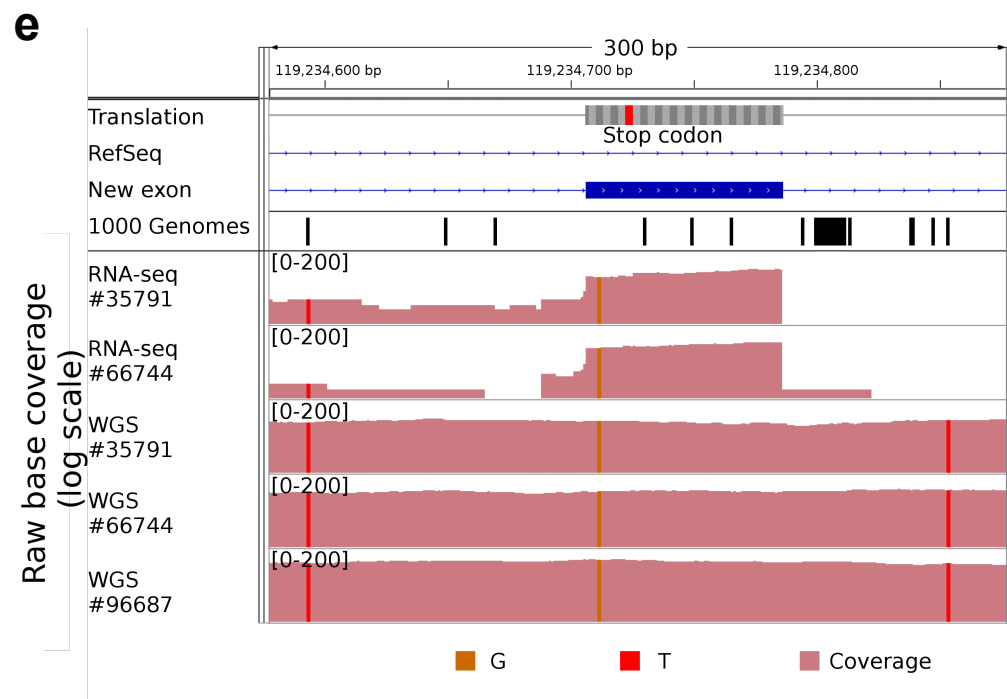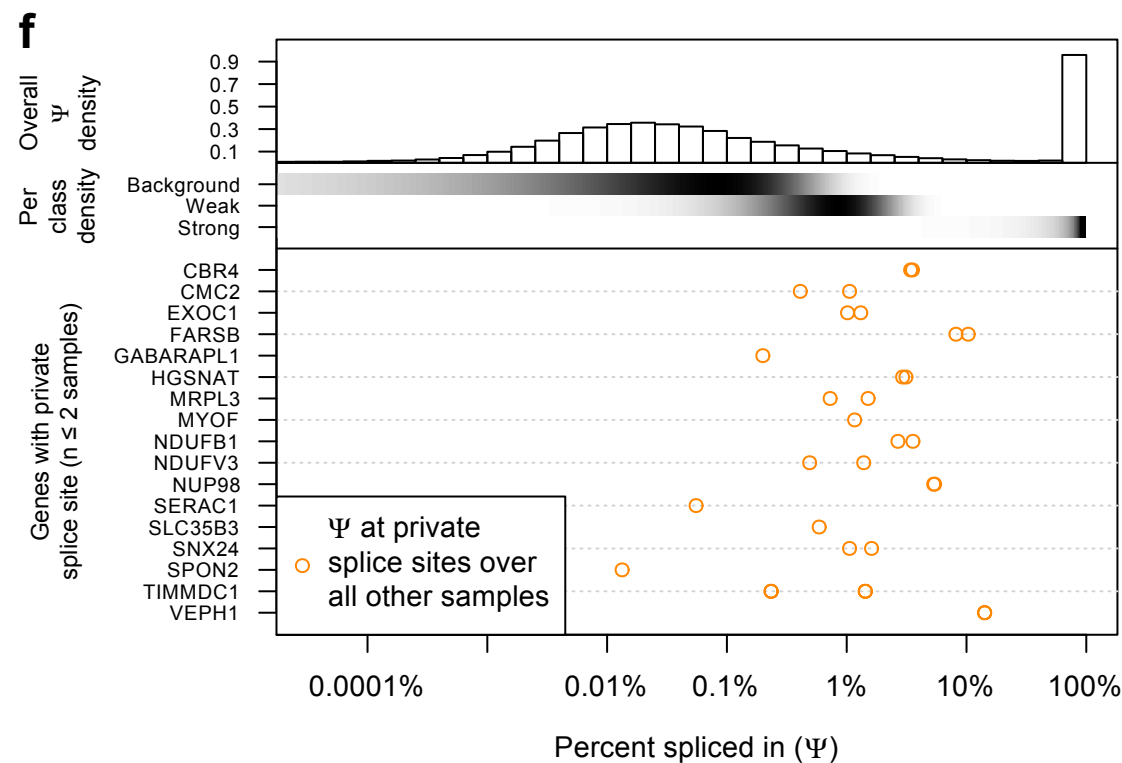

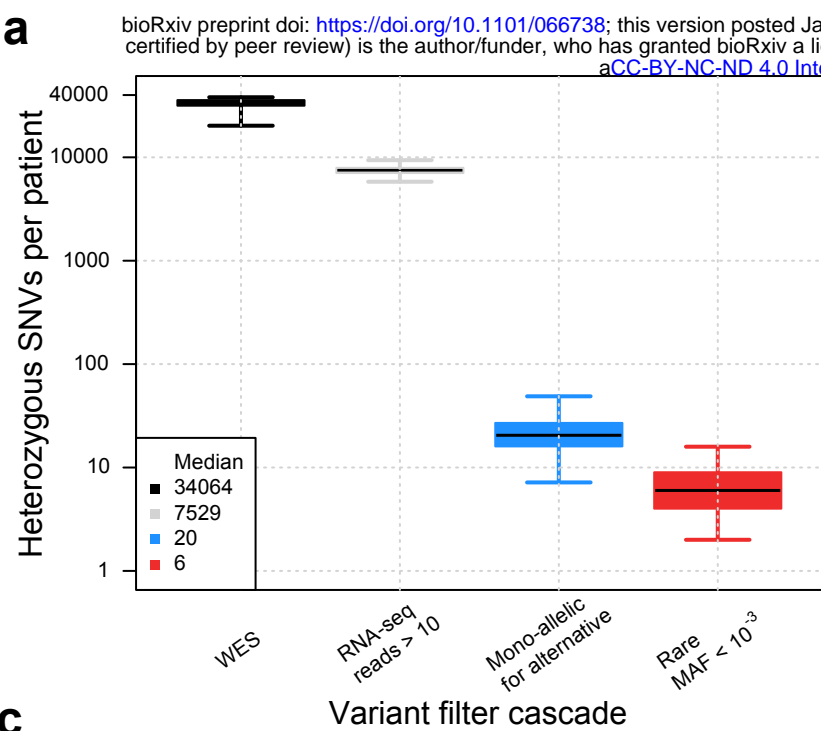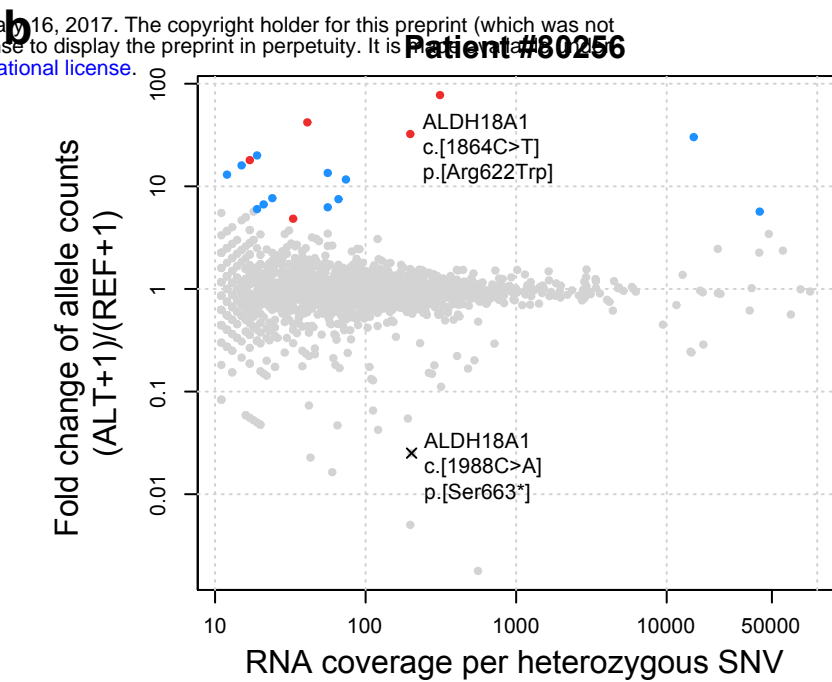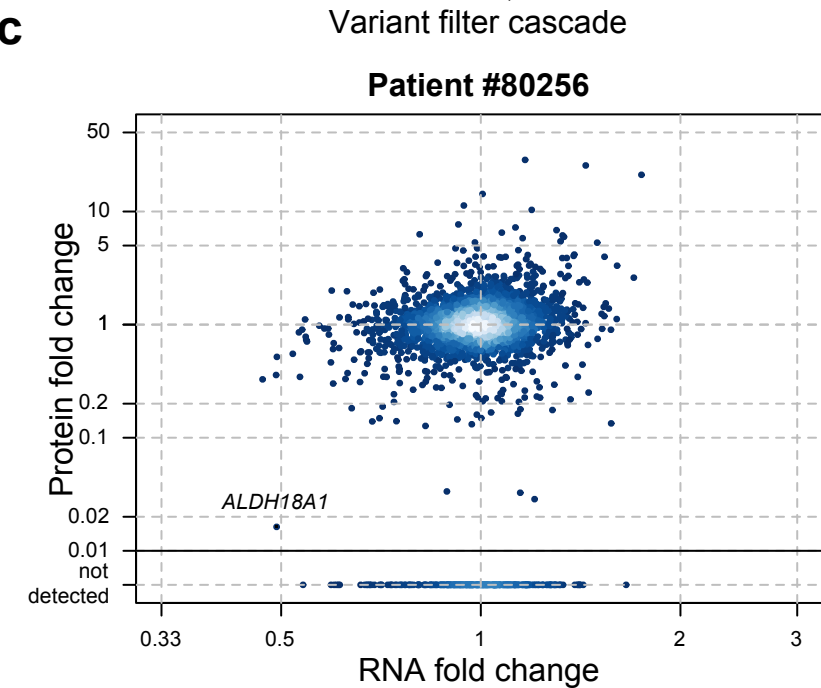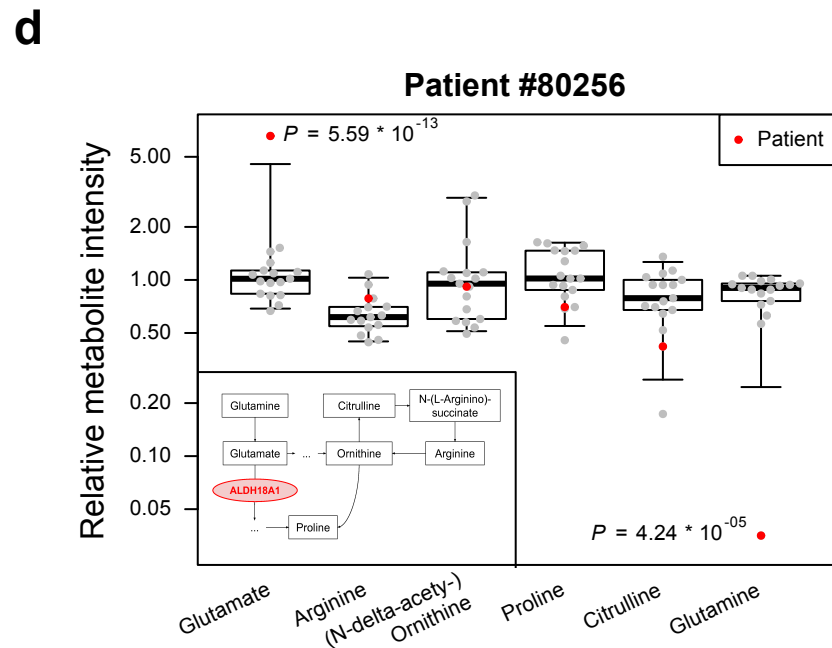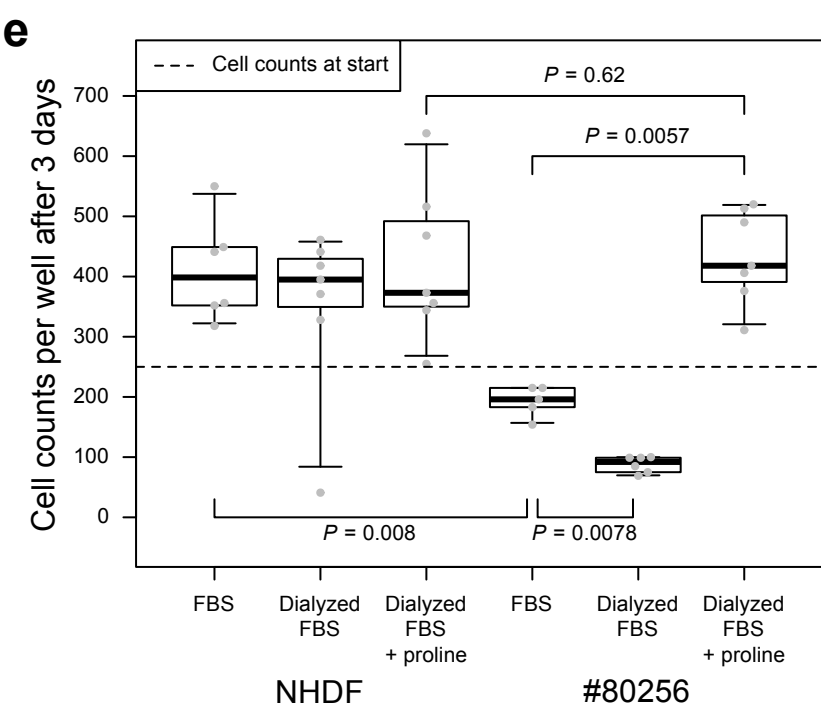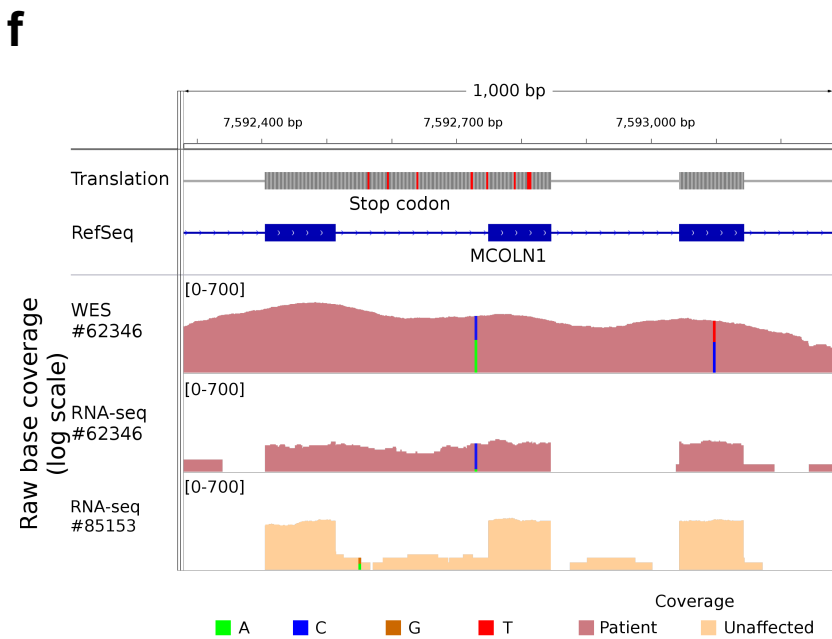

**a**

|                                     |                                                                                                              | TIMMDC1 | MGST1 | CLPP | ALDH18A1 | MCOLN1 | Candidates per sample |
|-------------------------------------|--------------------------------------------------------------------------------------------------------------|---------|-------|------|----------|--------|-----------------------|
| <b>Detected by</b>                  | Aberrant expression<br>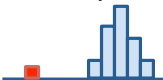     | ✓       | ✓     | -    | ✓        | ⋯      | 1± 1                  |
|                                     | Aberrant splicing<br>       | ✓       | -     | ✓    | -        | ⋯      | 5± 3                  |
|                                     | Mono-allelic expression<br> | -       | -     | -    | ✓        | ⋯      | 6± 3                  |
| <b>Validated by</b>                 | Proteomics/Western blot<br> | ✓       | ✓     | ✓    | ✓        | -      |                       |
|                                     | Complementation<br>         | ✓       | -     | -    | -        | -      |                       |
|                                     | Supplementation<br>       | -       | -     | -    | ✓        | -      |                       |
| Disease associated variant detected |                                                                                                              | ✓       | -     | ✓    | ✓        | ✓      |                       |

**b**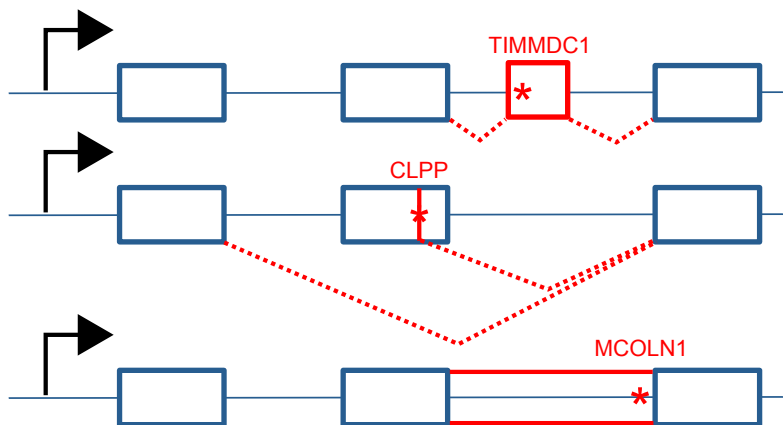

Source: http://biorxiv.org/content/10.1101/066738v2.full.pdf
